# Supplementary material for: Identification of Differentially-Expressed Genes in Response to Mycosphaerella fijiensis in the Resistant Musa Accession ‘Calcutta-4’ Using Suppression Subtractive Hybridization
Source: PubMed Central journal article supplement (PMC4972352; doi:10.1371/journal.pone.0160083), 2016-08-03
Supplement: pone.0160083.s001.pdf [file pone.0160083.s001.pdf]

S1 File. EST sequences.

TYPE: EST

STATUS: New

CONT\_NAME: Santos E

CITATION: Identification of differentially expressed genes in response to *Mycosphaerella fijiensis* in the resistant Musa accession Calcutta 4 using suppression subtractive hybridization.

LIBRARY: SSH Calcutta M. fijiensis library

EST#: 1A1 BMCIBE

DNA\_TYPE: cDNA

PUBLIC:

COMMENT: Raw sequences were clear up, from vector and cloning adaptors, with the program CLC Genomics Workbench (CLC bio, Denmark).

SEQUENCE:

CGAAGCCGCCCTGGAGTCGGCGCTGCTCG

CTGCCGCCGCGGCGAGTTTCACTTCAGGATACATCTTCGCGTTGCACGCCTCTCCACCAA

CTACATCACAAGCCTCCACCGGAAACACAGAGGTGGAGGAGCTGTAATCGATGGTCGAGG

ACTCTGGTGCGGTGACGGCGACCACCTGGACTTGTGGAAGGTCCTGCGTGGCTTGGATG

ACCTGGGCGCGATTGCCTTGGTGCTCCTGAGGGGC

||

TYPE: EST

STATUS: New

CONT\_NAME: Santos E

CITATION: Identification of differentially expressed genes in response to *Mycosphaerella fijiensis* in the resistant Musa accession Calcutta 4 using suppression subtractive hybridization.

LIBRARY: SSH Calcutta M. fijiensis library

EST#: 1A3 BMCIBE

DNA\_TYPE: cDNA

PUBLIC:

COMMENT: Raw sequences were clear up, from vector and cloning adaptors, with the program CLC Genomics Workbench (CLC bio, Denmark).

SEQUENCE:

GGAGGCAGCCGCGAAGAGGAAGATGATACTGAGGCTGGACTACGAGGCTGTCATCGCCGC

TTGCTCTTCTAATGTGTCGCTCGCTGTGGATAGATGGGGTGAGACCGGATTTTCGATCCCAA  
CGATTCATGGCCGGACGTCCCAGCGATGGCAAGAGGAGCAGCAGCGATGAAGGAGATGCA  
TTATCAACAGGAGGTGGTTCACGCGCGGACGAAGGAAGGGAGGCGAGGGTGTTCGAGGT

||

TYPE: EST

STATUS: New

CONT\_NAME: Santos E

CITATION: Identification of differentially expressed genes in response to *Mycosphaerella fijiensis* in the resistant Musa accession Calcutta-4 using suppression subtractive hybridization.

LIBRARY: SSH Calcutta M. fijiensis library

EST#: 1A7 BMCIBE

DNA\_TYPE: cDNA

PUBLIC:

COMMENT: Raw sequences were clear up, from vector and cloning adaptors, with the program CLC Genomics Workbench (CLC bio, Denmark).

SEQUENCE:

ACGATGCCCCGGCCTTCCAACCTCGACCTTGTTCCTTCGACATTGACATTGATATCGCTACG  
GGGAAAGTCCTCGGCCTCTCCTAGAATGTCATGTAAGTTTATATTTCCCGATTGTTGTTT  
CCTTAGTTCAAGTCCCAGCGTAAAAAGAGTCCAAGAAAGTTGAAGAACATTTCGCTTCATT  
AAACTTGGGATGCGTCAAATAACTGCTACAATGT

||

TYPE: EST

STATUS: New

CONT\_NAME: Santos E

CITATION: Identification of differentially expressed genes in response to *Mycosphaerella fijiensis* in the resistant Musa accession Calcutta 4 using suppression subtractive hybridization.

LIBRARY: SSH Calcutta M. fijiensis library

EST#: 1B3 BMCIBE

DNA\_TYPE: cDNA

PUBLIC:

COMMENT: Raw sequences were clear up, from vector and cloning adaptors, with the program CLC Genomics Workbench (CLC bio, Denmark).

SEQUENCE:

CACCATATCCCCACTCATCCATGCCAACTTTTTGAGCACAAAGCGTTTAGTGATGCCAGCA  
TATACTTATCATAAACTGAAATTCTCCTAGCTCGGCTGCAGCCCTTGCTCGAATTA  
TCTCAGATGGGCAAGAAGGATACCTAAGTTCACCAGCAGGGCCCATACCAACTTGAATTT  
CCGTTATTACAACTCGTAAGAAGTCCCTGAATGTATCCCTGAAACTCCTCATAAAATCTG  
AATAAGCCTGGATTGGAGATCGTCCCCTTAGAACAGGAAAAACATCACATCCCAAAGAGA  
TGT

||

TYPE: EST

STATUS: New

CONT\_NAME: Santos E

CITATION: Identification of differentially expressed genes in response to *Mycosphaerella fijiensis* in the resistant *Musa* accession Calcutta 4 using suppression subtractive hybridization.

LIBRARY: SSH Calcutta *M. fijiensis* library

EST#: 1B4 BMCIBE

DNA\_TYPE: cDNA

PUBLIC:

COMMENT: Raw sequences were clear up, from vector and cloning adaptors, with the program CLC Genomics Workbench (CLC bio, Denmark).

SEQUENCE:

CAAGACATCATTTAGCAACCGGCACTGCTCATTGTGCCGAGTCCCTTGGTGAGGCTGAGA  
TCCATTTTGCAGCGAGCCCTGTTGGCAATAGAAACACCATTGGTGCCTCAAGAGGTGATT  
CAAGCCACATGGAAACATCCAAAATCGGATGGGACTTGTGCGCTCCGATTGGGACTGCCTT  
CACCTCCATCCTTCGAAGAAAGT

||

TYPE: EST

STATUS: New

CONT\_NAME: Santos E

CITATION: Identification of differentially expressed genes in response to *Mycosphaerella fijiensis* in the resistant *Musa* accession Calcutta 4 using suppression subtractive hybridization.

LIBRARY: SSH Calcutta *M. fijiensis* library

EST#: 1B5 BMCIBE

DNA\_TYPE: cDNA

PUBLIC:

COMMENT: Raw sequences were clear up, from vector and cloning adaptors, with the program CLC Genomics Workbench (CLC bio, Denmark).

SEQUENCE:

ACTACTACTGTATTCTCTTTGTGAGAGTATGATTGCGAGCAACTGATGATTTGATCAGGT  
AATTTCTCCTTTCTTTCTATAAGCTTATGAGCATGCATTAATTGCTTGGATTTATATATT  
GCTTATGTGAATTTTCACCTGCTTTATTTATGATGATATCATTCTCTTTGTGTTTCATCT  
GCCTATATAGAGGAAGCTATTGATGCATGAAATAAATTAGAGAAGCAGGATATATGATAA  
CATCATGAACAACCTTTGTTTCACTATGAACATTCTCAAAGATGATAGTGTGATTGCTTTT  
TCTTTCCCAAATAACCAAAAATGGGTTTCAGATATGGAGAAATCATCATCCTGCCTAC  
TTGATATGATCCAAACAAAACCTTGGCACCTTAGCTACTTTTTTGGAGTAGCTTGAAGTA  
TCGAAAAAGGCGAAAACTACTATGAGTTTTTCAGCTCTAGTTTAATTGATAGATCCCAT  
GATCTACAGTTTGGTTATCCTCCTGGATGAACAATGTAATCTCTAACCTTCTCTCTATTC  
TTGATAAGAATGCTTACAAGTCAGATTGTCAAACATGTGTATTGTGCTAAAAAAAAAAAA  
AAAAAAAAAAAAAAAAAAAAAAAAAGCTTGT

||

TYPE: EST

STATUS: New

CONT\_NAME: Santos E

CITATION: Identification of differentially expressed genes in response to *Mycosphaerella fijiensis* in the resistant *Musa* accession Calcutta 4 using suppression subtractive hybridization.

LIBRARY: SSH Calcutta *M. fijiensis* library

EST#: 1B9 BMCIBE

DNA\_TYPE: cDNA

PUBLIC:

COMMENT: Raw sequences were clear up, from vector and cloning adaptors, with the program CLC Genomics Workbench (CLC bio, Denmark).

SEQUENCE:

ACTGAACCCTCCCTGATGCCGAGAGCCTGTGCAACAGTATCATTGTTTCCCAGGCGTGG  
GAGAGCAAATACCAATAATTCCTACACAAAGGATCATTAGTGTTTCGACGCAGGGAGCTCG  
GAAAGTGCTTCGAGTAACTCCTCCTGTCCGCGAGTGATTATGTTGGGCTTCGGGCTTCA

GGGAAGCTGCACTGAGGCTCCAGAATCTGGGCAGCGTTAATCCCACTGAGATCCTGCATG  
TTCATAATGTTCTCTGTTTTACTGTATCCACCCACCTTGACACTC

||

TYPE: EST

STATUS: New

CONT\_NAME: Santos E

CITATION: Identification of differentially expressed genes in response to *Mycosphaerella fijiensis* in the resistant Musa accession Calcutta 4 using suppression subtractive hybridization.

LIBRARY: SSH Calcutta M. fijiensis library

EST#: 1B10 BMCIBE

DNA\_TYPE: cDNA

PUBLIC:

COMMENT: Raw sequences were clear up, from vector and cloning adaptors, with the program CLC Genomics Workbench (CLC bio, Denmark).

SEQUENCE:

AGAAATGCGACCATGCAAAAATGTATGAGAAAATTCGGACGAGAACTTACAGCTGATGC  
GTGAGAGGCTAATGGAGACCGTCATTTGGCCATCAGATGACACAAACATGGAGAAAATTG  
ATTGATTCGCAACGTGTGTGTGTGTGTGTGCTCACCTTAGTTTGTAGTTTAGCAAAATCA  
AATCTTTATGTCCCGTTCCGATGGTTTCTGTATATAATGTTTTACGATCTGATTATAGAA  
ATATAGGTCTCGGTCATGCGACCTGTTAAGCACGAAAAAAAAAAAAAAAAAAAAAAAAAAAA  
AAGCTTGT

||

TYPE: EST

STATUS: New

CONT\_NAME: Santos E

CITATION: Identification of differentially expressed genes in response to *Mycosphaerella fijiensis* in the resistant Musa accession Calcutta 4 using suppression subtractive hybridization.

LIBRARY: SSH Calcutta M. fijiensis library

EST#: 1B12 BMCIBE

DNA\_TYPE: cDNA

PUBLIC:

COMMENT: Raw sequences were clear up, from vector and cloning adaptors, with the program CLC Genomics Workbench (CLC bio, Denmark).

SEQUENCE:

ACTCCTCCTCATCAGATATCTCAAGCCTAGGCTTCTTAAACAAAGACCCACACTTGTGTC  
CTCTGTAGAATCCTGTATCACTAGCTTGTGGAACAGGGAATTTGTTGGCTCTGTAGAAGC  
CTGTGTTGCTTGCTTGTGTGGTGGGGAGTTCAGGGACTTGAGCTGCTGTTTGGGTCGCCT  
TGGGCAGTTGGTCATGGAAAAGACCAATGTCTGCAAACCAATCCAACCTCCTCATATCCTA  
CAGGAGACCCCTTGTAAACCAGTTTCTTGGTCATAAAGTTGAAGGAACTCATCAGCAGCCC  
ATGCCGAGTCCATGAATGATGAAATGGTTTGTGGTGTTCAGGAACTTTTGC GGCTGGTG  
TG

||

TYPE: EST

STATUS: New

CONT\_NAME: Santos E

CITATION: Identification of differentially expressed genes in response to *Mycosphaerella fijiensis* in the resistant *Musa* accession Calcutta 4 using suppression subtractive hybridization.

LIBRARY: SSH Calcutta *M. fijiensis* library

EST#: 1C2 BMCIBE

DNA\_TYPE: cDNA

PUBLIC:

COMMENT: Raw sequences were clear up, from vector and cloning adaptors, with the program CLC Genomics Workbench (CLC bio, Denmark).

SEQUENCE:

ATGTGAGTATCGCTGCAAAGTCTGGAGTAAAGTTGGAGATCTCTGATGGAGCTGCCTCG  
AGAACAAGGTGATCAATGGCCCCGAAGATATCTGAGCATATTCACGAAATTTTGGCGTGT  
AATTTGGGCTGCTCCATGAGAGGCTTTGGATTCCCTCTAGAGAGGTTTTGACTCTCACTC  
TTGAGCATTTTACCCTCTTTGTTCTCAACTCATGAAATGTGAGCATGTTTTACTCAAAC  
AAAGAGAAAACCTCCTGCATTTACATTGTTGTTTTCTCGCTGCCGTGAGATGCAGCATATA  
ATGTTGTGAAACCAAATTTTTAAAAAAAAAAAAAAAAATAAAAAAAAAAAAAAAAAAAAAAAAAA  
AAAGCTTGT

||

TYPE: EST

STATUS: New

CONT\_NAME: Santos E

CITATION: Identification of differentially expressed genes in response to *Mycosphaerella fijiensis* in the resistant Musa accession Calcutta 4 using suppression subtractive hybridization.

LIBRARY: SSH Calcutta M. fijiensis library

EST#: 1C3 BMCIBE

DNA\_TYPE: cDNA

PUBLIC:

COMMENT: Raw sequences were clear up, from vector and cloning adaptors, with the program CLC Genomics Workbench (CLC bio, Denmark).

SEQUENCE:

```
CCTAGCTCACGTGAAAAATCTGAAGCATCTTCTACCCAACACCAAGCTGGTGGCCTAGGG
ACAACCTCTTTTCCNCGTCAGGGTTCCAGCGAATCCTTTTGATTTTCTTCTATGCAG
AACCTCCTTAACGATCCTACAATTAAGAAATGCCTGAGCANATTGCTAAGGACCCTGTA
TTCANTCAAATGGTTGAACAGCTTCAAAGATTGTCCATAGCGTATGTCAAGAAAGTGTC
CCTCCATTGGATCCTCAACAATACGTTTCAACGATGCAACAAGTCATGCAAAATCCTCAG
TTCATGAATATGGATGAACGCCTTGTAATGCTATCATGCATGATCNTGGAATGTCTTCA
ACGCTTGACATTTTGGCAAATCCTGCTCAAAAAGAACACATTGAAGAACTAATGGCTCGC
ATGAAGGATGATCCATCCCTGAANACAATTCTTGAAGANATACAAAGTGGAGGTCCCTCT
GCAATGATGAAGT
```

||

TYPE: EST

STATUS: New

CONT\_NAME: Santos E

CITATION: Identification of differentially expressed genes in response to *Mycosphaerella fijiensis* in the resistant Musa accession Calcutta 4 using suppression subtractive hybridization.

LIBRARY: SSH Calcutta M. fijiensis library

EST#: 1C7 BMCIBE

DNA\_TYPE: cDNA

PUBLIC:

COMMENT: Raw sequences were clear up, from vector and cloning adaptors, with the program CLC Genomics Workbench (CLC bio, Denmark).

SEQUENCE:

GGGCCTCGACGACGAGGAACGGGGTAGGAACAGCATCTGGGAGCCGATGCTGTTGACGGC  
AGCCATCGATGGATAAGATGGAAGAAGGGATTCGCTCTCGGAAGAAAGGGCTGAGAGATC  
GG

||

TYPE: EST

STATUS: New

CONT\_NAME: Santos E

CITATION: Identification of differentially expressed genes in response to *Mycosphaerella fijiensis* in the resistant Musa accession Calcutta 4 using suppression subtractive hybridization.

LIBRARY: SSH Calcutta M. fijiensis library

EST#: 1C8 BMCIBE

DNA\_TYPE: cDNA

PUBLIC:

COMMENT: Raw sequences were clear up, from vector and cloning adaptors, with the program CLC Genomics Workbench (CLC bio, Denmark).

SEQUENCE:

ACTATGCAACAACCAAATCTCTCCTCGATGATGTTCTTGCAAAGATAGGCTAGAGGGTCCG  
ATGTCTGAACTATTCTTCGGAATTCTTATCTCAAGAAAGATATCATCAGTGATGTAAGCT  
TCCATCTTTGTCCAGTTTGCATCTTCGGGCAGCTCGAGACGCCTAGCAAATCCATACTCC  
CACCAGCGGCCATTTTTCCAGTCCTTTGGATCAGTTTCTCGCCCTCTCCACCGCCCACTG  
ATCTCGACCACCATTTCTTCAGGTTGCATACATCTATATCACATTTTCTTGACCAACT  
GAAACAAACATGAAGCTCTTAAGATATTGTATAGCTTAATCAGATTCATGAACATTTAGA  
CGGATCGGAGGCATCTGAATACTTGTTTGTCTCTGTTAATCTTCAAGTAGAGAAGTTTT  
TGGAGAAGGTTATCATCATACATGT

||

TYPE: EST

STATUS: New

CONT\_NAME: Santos E

CITATION: Identification of differentially expressed genes in response to *Mycosphaerella fijiensis* in the resistant Musa accession Calcutta 4 using suppression subtractive hybridization.

LIBRARY: SSH Calcutta M. fijiensis library



EST#: 1C9 BMCIBE

DNA\_TYPE: cDNA

PUBLIC:

COMMENT: Raw sequences were clear up, from vector and cloning adaptors, with the program CLC Genomics Workbench (CLC bio, Denmark).

SEQUENCE:

```
TTTTTTTTTTCCAGCAATTTGATCCATATGAGAATTATTGAATAACTATACAAATCCTT
GTGCTTCGCAGTTGCTGACCTCATGTTATTTGCAGCAAAGGTCCCTAACCTTACCTTAC
AAGATCGATCAAAACAACACATTATTAAGAATAAGAATTCAACAGCCATCAACCGATGAC
TCATGCCAGTAACGTGCCAAACAAATATTAGTGTGTGATCATAACGCTTAAAGGGAACAC
CTGTTTGTTCACAGTGACATATAGGGGCACGGAATATGACATAGCAATCATGTTTTCT
TAATCTGCCCCGAGATTGACCAGCCCCGAGAAGACAAGATGATTCCAACAATGAGACCATAG
AGAGCAAGGGCTTCCGCAAAAATGAAAATAAGAATCATGCCTACAAATAGCTTCGGCTGT
TGAGCGTTGGCCCTGACTCCGGCATCACCGACAATCCCAATCGCCATTCCGGCAGAGAGG
CCAGCGAGACCACAGGCGAGCCCCGAGGAGAGGTGCGCGT
```

||

TYPE: EST

STATUS: New

CONT\_NAME: Santos E

CITATION: Identification of differentially expressed genes in response to *Mycosphaerella fijiensis* in the resistant *Musa* accession Calcutta 4 using suppression subtractive hybridization.

LIBRARY: SSH Calcutta *M. fijiensis* library

EST#: 1C10 BMCIBE

DNA\_TYPE: cDNA

PUBLIC:

COMMENT: Raw sequences were clear up, from vector and cloning adaptors, with the program CLC Genomics Workbench (CLC bio, Denmark).

SEQUENCE:

```
ATCTATCTCACCTGTTCCAGAACCGGATCTCATCCCACGGGATCCACTACCTGATGGCC
GGGCTGCTGCTCAGCAAGGCCCTCTACCTCGTCTTCGCCGCCGAGGACCAGCACTACATC
CGGCAGACCGGCACCCCGCACGGCTGGGACATCCCCTTCTACCTTCCAGTTCCTGAAA
GGCGTCTCTTGTTCACCGTGATCGTCCTCATCGGCACCGGCTGGTCCTTCTCAAGCCC
```

TTCCTCCAGGAGCGCGAGAAGAAGGTGCTAATGATCGTGATCCCACTTCAGATAATCGCC  
AACATCGCCTCCGTGGTGATCGGGGAGACCGGACCCTTCATCAGGGATTGGGTCACCTGG  
AACCAGGTGTTCTCCTCATCGACATCATCTGCTGCTGCACCGTCCTGTTCCCCATCATC  
TGGTCCATCAGATCTCTGCGTGAGACGTCAAAGACCGACGGAAAGGCCGCAAGGAACCTC  
ATGAAGCTCACACTTTCCGGCAATTCTACATCATTGTGATCGGATATTTGT

||

TYPE: EST

STATUS: New

CONT\_NAME: Santos E

CITATION: Identification of differentially expressed genes in response to *Mycosphaerella fijiensis* in the resistant *Musa* accession Calcutta 4 using suppression subtractive hybridization.

LIBRARY: SSH Calcutta *M. fijiensis* library

EST#: 1D2 BMCIBE

DNA\_TYPE: cDNA

PUBLIC:

COMMENT: Raw sequences were clear up, from vector and cloning adaptors, with the program CLC Genomics Workbench (CLC bio, Denmark).

SEQUENCE:

GCCGCGGCAACTAAGGTGTTTGTCTCCCGGTTGGCCCGGCGAGGCTGTTCTTGTGATT  
CCATCCACAAATTTCTGCTGATAGCCTTCCAGCCGAGCAGCTCGAGGTCGAAATCCAAC  
TCTCTGGCACTCAATGACGCCTTGAGTCTGCTGCTCGGCAGCTGCAAGGCCGGAGGTGTC  
ATCAAGCCGCCGCTTGATTCATCCACGCCCGCAGCCCCTAAACCCGACGAAGCCGTA  
GGGGACATCGGCGAGCCTGGCTGCTGCATCAGCGTCAAGGCCATCGCCATGTCCAAAGAG  
GAAAGAGCCGGCGACGACGATCTTGGAGAGGACAACAACGTTCCCGCAACTGATGCCGCA  
GAGGGGTTACCGTCCGAGCTCCTCCGGCTTGTGGGCAAAGAAGCAAACCCGGCGGTTG  
CAGCATGNCTCATCCTTGACAGATCCG

||

TYPE: EST

STATUS: New

CONT\_NAME: Santos E

CITATION: Identification of differentially expressed genes in response to *Mycosphaerella fijiensis* in the resistant *Musa* accession Calcutta 4 using suppression subtractive hybridization.

LIBRARY: SSH Calcutta M. fijiensis library

EST#: 1D8 BMCIBE

DNA\_TYPE: cDNA

PUBLIC:

COMMENT: Raw sequences were clear up, from vector and cloning adaptors, with the program CLC Genomics Workbench (CLC bio, Denmark).

SEQUENCE:

ACAAGTGTAGGAGAATAAACATGCAAAGAGGCACGGAAGAAGACGATGACTGCTTTGGTA  
AGGGAGTAGTGCACTCTCAGACTTTGGCTGCCTCAGCAACAGCAGCTGCCCTCTCGGCAA  
CGATCTGCTCATATAAGTCTCTTATCTTCAAACCGATAATGGTCTGGAAGAGGCCGGTGC  
CGTTGTTGCTGCCGGGGAAGTCGGCGTGCTCAGCATCTGCTGCGTCACCTCCCCGTAGA  
ACTTAGTCGACAGGTTGCTCAGATGGCTCTCCACATAGATCAGCTCATCCAACCTGTCTGA  
ACTGCCCATCCATCTCCAACACCGAGACCTCGTTGGAGTAGTAGGTGTCCGGGCCGTAAG  
AGAACTGGATGCCGGGGT

||

TYPE: EST

STATUS: New

CONT\_NAME: Santos E

CITATION: Identification of differentially expressed genes in response to Mycosphaerella fijiensis in the resistant Musa accession Calcutta 4 using suppression subtractive hybridization.

LIBRARY: SSH Calcutta M. fijiensis library

EST#: 1D11 BMCIBE

DNA\_TYPE: cDNA

PUBLIC:

COMMENT: Raw sequences were clear up, from vector and cloning adaptors, with the program CLC Genomics Workbench (CLC bio, Denmark).

SEQUENCE:

TCCCTGGTCCCCGGCCNCCTGGGCCGGGGAATTTAAACCAACTCCTTTTGGGGCACCGT  
GGTCGCCGCAAGGTACTTGCTCCNGGGCCATGTATAAATGCAAGAACCGGAACTAGGGG  
CCATCGCCGACCCTTCTATGAACTCAAACCTGAATCAGGTGCCTCCATATGGCCCTCAA  
AATGTTTAAACAAGGCCACCGNAACCGTCATATATCTACCATATTGCATAGTTTGCTACT  
AAGACTCTGTTAGCTAAGATCCCTANGATCATATAAGCTATTTATGATTGTGAATTTGG

TGTTTGTATGTCTGACTTGCTATTGTTGTATGTCTGAACATTTGGCTTGCTGTTTGCAAC

TGGTATAATTTAA

||

TYPE: EST

STATUS: New

CONT\_NAME: Santos E

CITATION: Identification of differentially expressed genes in response to *Mycosphaerella fijiensis* in the resistant Musa accession Calcutta 4 using suppression subtractive hybridization.

LIBRARY: SSH Calcutta M. fijiensis library

EST#: 1E1 BMCIBE

DNA\_TYPE: cDNA

PUBLIC:

COMMENT: Raw sequences were clear up, from vector and cloning adaptors, with the program CLC Genomics Workbench (CLC bio, Denmark).

SEQUENCE:

ACTTTGGTTGAAGAACCAAAACAAATCAGGGAAGCGCTGCAAAATTTACTGATGAGCATC  
TCTTCTAAGGCAGAACCCACAAGTAGTGTGAATCCATTTTCTTTCTTGACATCGTCCTT  
TCAGTAAATATTGGCCATAGCTATAACAAACACTTGGCTTTTGATGCTCGAAACCCATA  
TAGACAAAAGGGGCCACAGGAATTTAGCTGGAGAGTGTTCTTGCAAGTGATGATAAATAC  
TCAGAAAGAGGATCGTTCAAGTGGGGGCACAAATTCACCAAAATCTCCAATCTGCATGCC  
CGGTGACCAATGTTGGCTTGTTGTATCAGGTCCTGTATGAGGAAGACCACGCATACCACC  
AAAAACATCGTTATCAAAGTAAGGGATTGGATCAAGGATGTGATTCAAGATTCTCCAATC  
GGGCCAATGACCAGATGGGTTTGGGGCAAATGGAGT

||

TYPE: EST

STATUS: New

CONT\_NAME: Santos E

CITATION: Identification of differentially expressed genes in response to *Mycosphaerella fijiensis* in the resistant Musa accession Calcutta 4 using suppression subtractive hybridization.

LIBRARY: SSH Calcutta M. fijiensis library

EST#: 1E3 BMCIBE

DNA\_TYPE: cDNA

PUBLIC:

COMMENT: Raw sequences were clear up, from vector and cloning adaptors, with the program CLC Genomics Workbench (CLC bio, Denmark).

SEQUENCE:

ACTATGGGCGATGCAAAACCTCCAACATTTGAGAAAAAAGGACAGTTTATAACTCATACA  
TATTTTCATCCATTTCTGATCTCTGCTGTAGATAAAGACCATATCCAATATGTTCTCAAAA  
GCTCAAAATGCCGCCACCCAGATGCTGTGCTCTTTGTTGATCCTGACCCAGTCGTCGAA  
GGTAGGCTTCTCTCAATAGAAGAAAGATCTTGTAAGAATCTCCAGGACGCCTTGCAGAG  
TCTTTGGGAGGGTTTCAGTCCAGAATTGTGACCTAAGGTCATCCTAGCAGTGGCAGGATCA  
TTAGGTGGGGGTGGTAGTGGAGACCTTAACCTTTCTTGCTCCACCAGGAGGAGGTGCAAGA  
AATGTTGTTGCCTTATGTTTGCTAGAGACTCCTGCAGACAAGCCAGCAGCTGAAAGCATG  
CCACCTCCACTAGCAGGTTTGTGTTTTTACATTTATTCGAATGGTTTCGCCTTCCTTCAAC  
CGATGATTGACAGCGGGATGGATCTCGATGTGGCTCTCATCAGTGTGACGCTGGTTTCC  
TTCTCGTGCTCCTTCCTCAGGT

||

TYPE: EST

STATUS: New

CONT\_NAME: Santos E

CITATION: Identification of differentially expressed genes in response to *Mycosphaerella fijiensis* in the resistant *Musa* accession Calcutta 4 using suppression subtractive hybridization.

LIBRARY: SSH Calcutta M. fijiensis library

EST#: 1E6 BMCIBE

DNA\_TYPE: cDNA

PUBLIC:

COMMENT: Raw sequences were clear up, from vector and cloning adaptors, with the program CLC Genomics Workbench (CLC bio, Denmark).

SEQUENCE:

CGGAGGGGCGGCTACGACGGGAGGTCGACGGTGCCAATGCTTTGGGACGCGGAGAGGAAG  
GAAGTGGTGTGCAACGAGAGCTACGCGATCATCGAGTTCTTGAACCTCCGCTGACTTCGGT  
GGTGAGGTCCATGGTGGCTCAGGGTTGGACCTCTGCCCGTCGGAGCTCAAAAACGAGATC  
GACGACTGGAATCGGGTGATCTATCCCAACGTTAACAATGGGGTTTATAGATGCGGGTTT  
GCGCAGAGCCAAGAAGCATATGACACTGCAGTCAATGGATTGTTCAACACATTGGATATG

ATAGAATCTCATCTGTCTACCTCTCGCTACTTGTGTGGGGATGCACTGACTTTAGCTGAT  
GTCTGCCTATTTACTACTTTGATCCGTTTCGACCTTGTCTACAACATCCTCTTCAAGTGC  
ACAAAGAAGAAGCTACTTGAGT

||

TYPE: EST

STATUS: New

CONT\_NAME: Santos E

CITATION: Identification of differentially expressed genes in response to *Mycosphaerella fijiensis* in the resistant Musa accession Calcutta 4 using suppression subtractive hybridization.

LIBRARY: SSH Calcutta M. fijiensis library

EST#: 1E7 BMCIBE

DNA\_TYPE: cDNA

PUBLIC:

COMMENT: Raw sequences were clear up, from vector and cloning adaptors, with the program CLC Genomics Workbench (CLC bio, Denmark).

SEQUENCE:

ACTGTTCTTCCAATTATCTCACTTGAAGCCACATGAACTTGTTGTTACAGCAGAGGACA  
AAGAGGCAACAGAAATCTTCACGGGCAATCCTAACCTGGAATGTCTGAATGATAGTGTT  
GTGCCATGGGTCGGAAAGGTGCTACAGCAGGTTCTCGAATGGCCCTTGCCAGTCACATT  
GTGCTGGATGATGAACCCAGGAAGGCCAACATCGCCAGTCTCCCGTTTGCGAGCTCCTT  
CTCCTTGGCCTCCAGCG

||

TYPE: EST

STATUS: New

CONT\_NAME: Santos E

CITATION: Identification of differentially expressed genes in response to *Mycosphaerella fijiensis* in the resistant Musa accession Calcutta 4 using suppression subtractive hybridization.

LIBRARY: SSH Calcutta M. fijiensis library

EST#: 1E8 BMCIBE

DNA\_TYPE: cDNA

PUBLIC:

COMMENT: Raw sequences were clear up, from vector and cloning adaptors, with the program CLC Genomics Workbench (CLC bio, Denmark).

SEQUENCE:

ACGATTGCTATTATTGTGCTCCCACAAACATCATCAAAGTAATATATCGAAAAGAAACG  
TCTTGTCCGACAAATGCCACAGAAAAGGTTTTCCGTGAACGAGAAATATACGTAGCAACG  
GAAGATGAACAAAGCCCGAGACAGCAGACCACAGGCGTAGCAGTTTTACGTTGAGAACTA  
GATGACAGTTCCACTAGGGATCAGTGCATCTTTGATGACGGTGACGATGCCACTCTTGAT  
GAAGTATCCGTCCGTCTCTCTTGCCGCTTCTTGACGTTATCACAGTTGATGATCTTGAC  
ATTCTCCCAATGCGAGCATTCTTGTCGATGATGGCTCTTTTGACGTGAGAATTTCTCC  
GATGCCCATGGGAACACTGCCTTTTGACGCTAACAGCCTCCTATCAGCATCAGTCTCATA  
ATAATCTGCTCCCATCAGTAGAGTGTCTTCGAGGACTGCACCTTCTGATATACAAGAACG  
AAGACCAATTACAGAATGGTGGATCTTGACGTTCTTGATCACACATCCCTCGCCAATCAC  
GCTATCAGTTACATCAGCATCCAGCATCTTGGAAGGAGGTAATATCGGGGTTGTGTATA  
AATTGGAGATGT

||

TYPE: EST

STATUS: New

CONT\_NAME: Santos E

CITATION: Identification of differentially expressed genes in response to *Mycosphaerella fijiensis* in the resistant *Musa* accession Calcutta 4 using suppression subtractive hybridization.

LIBRARY: SSH Calcutta M. *fijiensis* library

EST#: 1F11 BMCIBE

DNA\_TYPE: cDNA

PUBLIC:

COMMENT: Raw sequences were clear up, from vector and cloning adaptors, with the program CLC Genomics Workbench (CLC bio, Denmark).

SEQUENCE:

GGGAAAGGTCCCTAAGAACGACAGTTCCATCTCTCCACCTTTTTGCCTCTTCTCTCGA  
GCATCGTGGCTTCATGCAGCATGTGCGGCGCATCGCTCTGCATGTCTAGCTTGCCAGAG  
CAACTGCTTGCATGTAGAATGCTGTGCGCCAATCTGGATAGACACATTGTGCTTGATTG  
CATCCCTCAGTGCAGCATCAGGTTGATCGCACAGGAGATGACACAGGCTTCGTCTTGAT  
ATATCGTAGGTGAGACCATAGTTCCAACATCTAAGAACTGAGAGTAACACTCAATAGCCG

TCTTAAAATCTTTATCACGAAAGGCAAAGTCCCCCTCTTCTGGCATCCAGTATATCCC  
TCATCTGTTGCGTCCACTCTTGAATGATAACTCATTGGTTCCTTCATCATCTCTGTAGT  
GTGTCATTACTAAAATCTGATGGATGGCAGTGAGGTCCATTCTGGAGCAAGCTTCTCCCA  
TAGGGGAAAGTGGGTGCGGTGGTGTGGCAGGTGCTTCCTCAGGCTTTTGTATCCCAGCA  
TAACATAAGACGGCT

||

TYPE: EST

STATUS: New

CONT\_NAME: Santos E

CITATION: Identification of differentially expressed genes in response to *Mycosphaerella fijiensis* in the resistant *Musa* accession Calcutta 4 using suppression subtractive hybridization.

LIBRARY: SSH Calcutta *M. fijiensis* library

EST#: 1G5 BMCIBE

DNA\_TYPE: cDNA

PUBLIC:

COMMENT: Raw sequences were clear up, from vector and cloning adaptors, with the program CLC Genomics Workbench (CLC bio, Denmark).

SEQUENCE:

AGGTA CTCCCGTCGCTGGACGACATCTGGAACGAGGACAGCGTGGAAATGGNCAAGATTTTG  
TGCACCATTAAGGTACAGANAACCACTTTCTTGGATTTTAGTTACCACTCGATCTAAAGA  
TATTGCAAACGTGGTTGGGGATCCGTTCCCTCTTNTGGTCTGGATGACACTGGCTATTG  
GGAATTTTTCGGGCGGTGTACATTTGGTTCCGAATACGCTGGTGAATGTCCCCGGCTAGA  
AATCGTAGGAAACCATCGCTGGCTGGTTCAAGGGGTTGCCACTTGCGNCAAGGACGGT  
AGGCGGGTTGTTTAAGACGCANATGAATGAGGAGCACTGGAGAATCATCGCATGGAGTGA  
AATATGGCAACTACCGCAAACCAAGAGGGTGTCTGCCANTCCTCCNCTGAGCTATCA  
TTGTCTTCCCTCACACCTTAAGCGGTGTTTTGGTTTTAGTTCTATGTTCCCAAAAATCA  
TCTGNTTAAAATCGGGACTTGAGACGGCATTGGATGGNACAAGGCTGCCCTGTGGTTCA  
CGACGACTTGACGNTGGAGGATGCNNTAAGCCGCTACTTCTATGAAG

||

TYPE: EST

STATUS: New

CONT\_NAME: Santos E



CITATION: Identification of differentially expressed genes in response to *Mycosphaerella fijiensis* in the resistant Musa accession Calcutta 4 using suppression subtractive hybridization.

LIBRARY: SSH Calcutta M. *fijiensis* library

EST#: 1G10 BMCIBE

DNA\_TYPE: cDNA

PUBLIC:

COMMENT: Raw sequences were clear up, from vector and cloning adaptors, with the program CLC Genomics Workbench (CLC bio, Denmark).

SEQUENCE:

```
ACTCCATTTAGTCTCTCCTATTTTTGACATCACTTATATTTACTAGGTGTGGATTCTTTA
AGAAAAGATACTTGCATAATGTCCAGAATGACAGATAATGCTATAAATCAGAAGCACTAA
AGTGTGTTTAATCTGCATCGAGCTTCTTGACATGTTTTTTAACTCTCAAATTATCAGT
GAGTTAGCAACTGTTAGCTAGTAATTACCATCACAACAAGACCACAAACCTTTCGTATTC
ACTCAGTG
```

||

TYPE: EST

STATUS: New

CONT\_NAME: Santos E

CITATION: Identification of differentially expressed genes in response to *Mycosphaerella fijiensis* in the resistant Musa accession Calcutta 4 using suppression subtractive hybridization.

LIBRARY: SSH Calcutta M. *fijiensis* library

EST#: 2A2 BMCIBE

DNA\_TYPE: cDNA

PUBLIC:

COMMENT: Raw sequences were clear up, from vector and cloning adaptors, with the program CLC Genomics Workbench (CLC bio, Denmark).

SEQUENCE:

```
ACCAACCACAGCCACAGTGCCAATCAAATGGCAGGACCCAATGATTTAAGTTTAAAGCA
GTCCTCCATCCCTAAACCATTTTGCATGACATCAACCCATTCGGGTCTCTCAAGCCCGAT
TTCAGTTGCATCTCACACAGTGGGTAGCTCAGGGAATGGTTCAAGCACCAATGATGATAC
AACAGGGCCTAAAGCTAGTAATCCACTGGTCCCAACAAACCGGAAAAATGTCACCAAAAC
TTTGTCTGCTGCTTTAGGCTCAGAACTGTGGAACTAGCACTCCTAAAGCTGT
```

||

TYPE: EST

STATUS: New

CONT\_NAME: Santos E

CITATION: Identification of differentially expressed genes in response to *Mycosphaerella fijiensis* in the resistant Musa accession Calcutta 4 using suppression subtractive hybridization.

LIBRARY: SSH Calcutta M. fijiensis library

EST#: 2A4 BMCIBE

DNA\_TYPE: cDNA

PUBLIC:

COMMENT: Raw sequences were clear up, from vector and cloning adaptors, with the program CLC Genomics Workbench (CLC bio, Denmark).

SEQUENCE:

```
GTATTCTGTGGAGCAAATATTAGAAGGTAGTGTGAATGCGCCAAGAGGCTTGAACATT
CGAAGCATGAATCTAATGTTGGTTCAACATGTCGCATGAAGAGCAAATAGAACATCTTCA
CATGCATGCTTGATGTCCATACTGTATTTGTTGGTCATGAATCCATGAACACAAGGCTT
GTTGAAAAAAAAAAAAAAAAAAAAAAAAAAAAAAAAAAGCTTG
```

||

TYPE: EST

STATUS: New

CONT\_NAME: Santos E

CITATION: Identification of differentially expressed genes in response to *Mycosphaerella fijiensis* in the resistant Musa accession Calcutta 4 using suppression subtractive hybridization.

LIBRARY: SSH Calcutta M. fijiensis library

EST#: 2A6 BMCIBE

DNA\_TYPE: cDNA

PUBLIC:

COMMENT: Raw sequences were clear up, from vector and cloning adaptors, with the program CLC Genomics Workbench (CLC bio, Denmark).

SEQUENCE:

```
ACAATACCTTATCAATGATACCATATTCAACTGCTTCACTAGGACTGAAATATTTCCGGAC
GTCTGATATCTTCTCGATTTGCTCACGAGATTTTCTATATGCTTCGAGTATAAGCCAA
```

CCAATTCAGCCTTCACATTTCTTATTTCTTTCTTGCAAGTTCAACATCTGTAGCTTGAC  
CTTGAAATCTTGCAATAGGCTGCTTTATCATTATTGTTGATGATGGTAGAGCAGAACGGT  
TTCCTTTAGAACCAGCAGCCAAGAGTAGTGCAGCTTCTCCCAAGCATTGCCAACACACA  
GTGTGAAGATTGGTGGTTTGACATAGCTCATGACATCGTAAATTGCAAAGCCTCTGTCT  
CATAGCCCAATTTCTCCCNCCCTTTGTTGTTCCAGTGGAATTTATGTATAGGTAAATCG  
GCTTTTCTACATCTTCATACTGAAGGTAAAGAAATTCTGCCATCATCAACTCTGTCACTG  
ATGGAACAAGAGACA

||

TYPE: EST

STATUS: New

CONT\_NAME: Santos E

CITATION: Identification of differentially expressed genes in response to *Mycosphaerella fijiensis* in the resistant *Musa* accession Calcutta 4 using suppression subtractive hybridization.

LIBRARY: SSH Calcutta *M. fijiensis* library

EST#: 2A9 BMCIBE

DNA\_TYPE: cDNA

PUBLIC:

COMMENT: Raw sequences were clear up, from vector and cloning adaptors, with the program CLC Genomics Workbench (CLC bio, Denmark).

SEQUENCE:

AAGAATAGGATACTACATCGGTTCCAGCCAAAAAAA  
AATTCCAAAAAATAAATTGACTTACCATAAAGAATTTAAAATCAAACCAAGGTTT  
TTATCCAAAAGTAAAAAAACCA

||

TYPE: EST

STATUS: New

CONT\_NAME: Santos E

CITATION: Identification of differentially expressed genes in response to *Mycosphaerella fijiensis* in the resistant *Musa* accession Calcutta 4 using suppression subtractive hybridization.

LIBRARY: SSH Calcutta *M. fijiensis* library

EST#: 2A10 BMCIBE

DNA\_TYPE: cDNA

PUBLIC:

COMMENT: Raw sequences were clear up, from vector and cloning adaptors, with the program CLC Genomics Workbench (CLC bio, Denmark).

SEQUENCE:

TAAAAGGAAATCTTGAAGCCTTTTCATGCAAGCAAACCTGGGACAGATAGAAAACCTCTCTT  
TCAGCTTAGAACAAAGAGATTCTTGATTATCTCGAACAACTTCTGATAGTGAAGTCTCAGCGC  
CTATGCAGTATTTGACTAGTAGATCAAGTCGAAAGACACTGATCTATCTTGTCTTACAC  
TAAGCCAA

||

TYPE: EST

STATUS: New

CONT\_NAME: Santos E

CITATION: Identification of differentially expressed genes in response to *Mycosphaerella fijiensis* in the resistant Musa accession Calcutta 4 using suppression subtractive hybridization.

LIBRARY: SSH Calcutta M. fijiensis library

EST#: 2A11 BMCIBE

DNA\_TYPE: cDNA

PUBLIC:

COMMENT: Raw sequences were clear up, from vector and cloning adaptors, with the program CLC Genomics Workbench (CLC bio, Denmark).

SEQUENCE:

ACGAGCTCTCGCTAAGGGACATGGTGGAGGGCGCCGAGGGTGGCGAAGACGGTGCAGGAGA  
TGGTAGAGAAGAGGAGGACAGAATCGAAGGATCGAAGTAAAGAGAAGAGAAGGCTGTTGA  
GGAAGGAGAGCATCGAGACCGGGGTTCCTTAAGATGTTTCGTGCCGATTTCCATAAGAG  
GAGGGAGAAGGAAGAGCTTTGGGGGGTCTAATACTTGCTCAAAGGTTTCACCGAGGCCCG  
TCTTGGCGGAAGCAGAGAAGGGTGGGCTTGAGGTCACGGAGGGAGAGTGGTGGGAGAAGG  
AGTTGGGTGGCAGAGGAAGCAGCAGCAGCAGCAGTAGCAGCTCCAAAAGCAGCAGCAGTA  
GCAGCTCCAAAAGTAGCATCGGAAGCAGCACAAGTAGAAGCGGTAGCAGGAAGATGAACG  
GCTGCTACGCTTTCTTCTCACAATAAAAAGCAGCTCCAAGGAAATTTAGGGATGCCAAG  
TATTTTGTGTTTGCTGATCACTGGAAGAAGAGAATGCAGCATGACATGT

||

TYPE: EST

STATUS: New

CONT\_NAME: Santos E

CITATION: Identification of differentially expressed genes in response to *Mycosphaerella fijiensis* in the resistant Musa accession Calcutta 4 using suppression subtractive hybridization.

LIBRARY: SSH Calcutta M. fijiensis library

EST#: 2B1 BMCIBE

DNA\_TYPE: cDNA

PUBLIC:

COMMENT: Raw sequences were clear up, from vector and cloning adaptors, with the program CLC Genomics Workbench (CLC bio, Denmark).

SEQUENCE:

```
CCATCGACAACCTCTTCGCGCACCTTGCTGACCCCGG
CCATGCCACAGTTTTCTGCTTTCACCCCAACTGAGCAAGGATTGGAGAAGCACACGA
TGCAGTCATGATAGATGTTGTAATCCTCGTGTGTTCTTGAGCTGTGCTTGTAAACGCTTTT
TACCTTTCTGCTCATGTAATTATAAGCAGCAATGGACGGTTTACCAGTTGCTTCAAAAAA
AAAAAAAAAAAAAAAAAAAAAAGCTTGT
```

||

TYPE: EST

STATUS: New

CONT\_NAME: Santos E

CITATION: Identification of differentially expressed genes in response to *Mycosphaerella fijiensis* in the resistant Musa accession Calcutta 4 using suppression subtractive hybridization.

LIBRARY: SSH Calcutta M. fijiensis library

EST#: 2B6 BMCIBE

DNA\_TYPE: cDNA

PUBLIC:

COMMENT: Raw sequences were clear up, from vector and cloning adaptors, with the program CLC Genomics Workbench (CLC bio, Denmark).

SEQUENCE:

```
ACCTTCTTTGGAGCATAATAATGAGGTCAGGGGAGAGAGTCTGGACTTGATAAAGTATAT
TGATGCTCATTTTGAAGGGCCTGCACTGAAACCTGATGATCCTGCAAAGCAGCAGTTTGC
AGAAGAGTTATTGTCATACAGTGATTCCTTCAATATGGTTATGTTTAAAGCAACGGCCGC
```

TAAGGGGGATGTCAGTGGTGAACCTTGATGCTGCCTATGAAAAAATAGAGGATGCTCTATC  
AAAGTTCAGTGATGGGCCTTTCTCCTTGGGCAATTCAGCCTGGTGGACATTGCATATGC  
TCCATTTGTTGAGAGGTTCCAGACTCTCTTGCTGGATGTGAAGAACTATGACATCCTCAA  
GGGCAGACCCAACTGGCATTGTGGATTGAGGAGCTGAACAAGATCGAGGCTTACGCGCA  
AACCCGAATTGATCCTCAAGAGCTGCTGTCCGCAACCAAGAAACGGTTTGGGTTGGCATG  
AAGAATATGTCTTCCAGTTTCAGATCAAGCAGTAATAAAACCATCAGCAGCCTTTGTAAT  
AAAAATGGGACTTTCTTGTTAATGCTGTGTTTTCCAATGTGTGATTCCATGTATTCTT  
CAAACATTTCAAAGCAATCAAGATTGNGCTTATGTGCTAAAAAAAAAAAAAAAAAAAAA  
AAAAAAAAAGCTTGT

||

TYPE: EST

STATUS: New

CONT\_NAME: Santos E

CITATION: Identification of differentially expressed genes in response to *Mycosphaerella fijiensis* in the resistant *Musa* accession Calcutta 4 using suppression subtractive hybridization.

LIBRARY: SSH Calcutta *M. fijiensis* library

EST#: 2B8 BMCIBE

DNA\_TYPE: cDNA

PUBLIC:

COMMENT: Raw sequences were clear up, from vector and cloning adaptors, with the program CLC Genomics Workbench (CLC bio, Denmark).

SEQUENCE:

GGGTCTCCACTCTCTACGCGCCTCTCATTTCGTGACGGCCGTATGGAGAAGTTCTACTGGG  
CGCCGACCAGAGATGACCGCATCGGCGTCTGCACGGGCATCTCAGGACCGACAACGTCC  
CCATGGAGGACATCGTCAAGCTCGTAGACTCCTTCCCGGGCAGTCCATCGACTTCTTTG  
GTGCTCTTCGGGCCAGGGTCTACGATGACGAAGTGAGGAAGTGGGTGGGAGACATTGGAG  
TGGACAAGGTTGGAAAGAAGCTGGTCAACTCGCTCGAAGGGCCACCAACCTTTGAGCAGC  
CCAAGATGAGCTTGGATACGCTGATGGAGTATGGCAACATGCTGGTGAAGGAACAGGAGA  
ACGTGAAGAGGGTGCAGCTGGCCGACAAGT

||

TYPE: EST

STATUS: New

CONT\_NAME: Santos E

CITATION: Identification of differentially expressed genes in response to *Mycosphaerella fijiensis* in the resistant *Musa* accession Calcutta 4 using suppression subtractive hybridization.

LIBRARY: SSH Calcutta M. *fijiensis* library

EST#: 2B9 BMCIBE

DNA\_TYPE: cDNA

PUBLIC:

COMMENT: Raw sequences were clear up, from vector and cloning adaptors, with the program CLC Genomics Workbench (CLC bio, Denmark).

SEQUENCE:

```
ACACGTCTGACATAAACATTGTATCAAATGCAAGCTGCACAACCAACTGTCTTGCTCCTC
TAGCCAAAGTCATCCATGACAGATTTGGAATAGTGGAGGGTTTGATGACTACAGTTCATT
CTATCACAGCCACTCAAAGACTGTTGATGGACATTTAGCAAGGACTGGAGAGGCGGAC
GTGCTGCAAGCTTTAACATCATTCTAGCAGCACTGGTGCTGCCAAGGCTGTTGGAAAGG
TCCTTCCTTCTTTGAATGGAAAGTTAACCGGTATGTCTTCCGTGTTCCGACTGTTGATG
TGTCTGTTGTAGATCTTACTGTCAGGCTTGAAAAGGCTGCCACCTATGATGAGATCAAGG
CTGCCATTAAGGAGGAATCCGAGGGAAAGCTTAAGGGCATTCTAGGATATGTGGAGGAGG
ACTTGGTCTCCACTGACTTTGTAGGAGACAGCAGGTCAAGCATCTTTGATGCCAAGGCAG
GAATTGCCTTGAATCCTAACTTTGCCAAGCTTGTGTCTTGGTATGATAACGAGTGGGGTT
ACAGCTCACGTGTAATTGACCTGATCCGCCACATTCACAAGACCAAAGTAAATTCGATTG
CTTCCCCGACTTGCTGTTCTCCGGCCGTTCTTCGGACCATTGCTTCTCTTTATTTTCAT
CACGAATAAATGTTTTGATGCGACATCTTTTTCATAATTGCCTCCCAGACTCTAGCCTGG
GCATTACATACATGCCAGTTTTTTGTTTTAGATGTTAATTATTCAGCTGAATGTGANGCT
GAAACCGTGT
```

||

TYPE: EST

STATUS: New

CONT\_NAME: Santos E

CITATION: Identification of differentially expressed genes in response to *Mycosphaerella fijiensis* in the resistant *Musa* accession Calcutta 4 using suppression subtractive hybridization.

LIBRARY: SSH Calcutta M. *fijiensis* library

EST#: 2B10 BMCIBE

DNA\_TYPE: cDNA

PUBLIC:

COMMENT: Raw sequences were clear up, from vector and cloning adaptors, with the program CLC Genomics Workbench (CLC bio, Denmark).

SEQUENCE:

GCAGACCTTCATTTTGATTTGGGTTACTTTCCGCACAGATTGGAACAAAGAGGTGGAACA  
AGCCATGAGAAGACTAGACAAATGGGAGGACAACAAGCAACCTCTGCTGAGCAATCTTGA  
CTAGGAAACAGATGACAGAATCAGCCTCCTAGTTATGGAACATCTCCATTGACATCACA  
ATTTACGAGGTGTCATCCATTACCTATGACAACATTACCAGCAGCAAGCTAGTATCTGAA  
GACAGAGAGACCTCAAAGAATGAAAGGAAGAAAGCAAGAAAGTAGATGGGTTTCCTCAA  
GTTTCTCCTAGAAATGGATCTATCAGTGTGTTAGCAGTTATGTCCTAATCTTGGGCATTA  
CAAGCTAAACAAGT

||

TYPE: EST

STATUS: New

CONT\_NAME: Santos E

CITATION: Identification of differentially expressed genes in response to *Mycosphaerella fijiensis* in the resistant *Musa* accession Calcutta 4 using suppression subtractive hybridization.

LIBRARY: SSH Calcutta *M. fijiensis* library

EST#: 2B11 BMCIBE

DNA\_TYPE: cDNA

PUBLIC:

COMMENT: Raw sequences were clear up, from vector and cloning adaptors, with the program CLC Genomics Workbench (CLC bio, Denmark).

SEQUENCE:

ACTCCGGCTGCCAGATTGGTAACACAGTCTCGCAACCATTGTCGTCGGAGGTCACTACCT  
TTCCCCGGTGTAATGGATCCATCTTCAAGATTAATCCCATCGCTATCCTGTGCAGGTTCT  
TCTTTATAATTGACGTCGTTAGTCAAATCATACAACCGTGAAGCACATAATTTAACCGCT  
TCTATCTCTTTGAACACTGCCACCTTCCCACTTCCAACTGTCTCTTAAATCCCCATTC  
ACAACAGCTTGCAAGTCTCCGAACGCCTCAGACCAGAGGAACCCATCGGAAGCATGCACG  
TCTATAGATGGCTTTGAGCAGCCTGACATTGTCGCCGAAAAGATGCCAAAATAAATACA  
GTCATAACTCTAAATCCGTACCTCGGCCG



||

TYPE: EST

STATUS: New

CONT\_NAME: Santos E

CITATION: Identification of differentially expressed genes in response to *Mycosphaerella fijiensis* in the resistant Musa accession Calcutta 4 using suppression subtractive hybridization.

LIBRARY: SSH Calcutta M. fijiensis library

EST#: 2B12 BMCIBE

DNA\_TYPE: cDNA

PUBLIC:

COMMENT: Raw sequences were clear up, from vector and cloning adaptors, with the program CLC Genomics Workbench (CLC bio, Denmark).

SEQUENCE:

ACCGGCTCGGCCGAACACTACCTGACGCTCCCGGTGAACGCGCCCAAGTGCCTCACCACA  
ACAATCACTACGATGGACTGATGAACGTCATGCACAGGGACGAGGAGGTCGATTACTTCC  
CTTCAAGGCATGCTTCCCTCCGTCATGCAGAGAGATTCCCCATTCAAATCGTATCGTCA  
CTGGCAAGCGTGAGAAGAATGTGATTCCCAAGCAAACGATTTCAAGCAACCCGGAGAGC  
GTTACCGTTCCTGGGCACCTGATAGGCAAGAGCGTTTCGTCGCCGTTGGGCCGAGCAAT  
TAGCACACCCAAAGGTCAGCTATGAGCTCCGCAGCATCTGGATCTCGTTCCTGTCTGAAGT  
GCGACACATCGCTGGGACAGAAGGTGGCGAATCGCCTCAACATGAGAGCAAACATCTGAT  
AAGGAGTATGCATGTAAAAGCCTGCAGTATATGCGT

||

TYPE: EST

STATUS: New

CONT\_NAME: Santos E

CITATION: Identification of differentially expressed genes in response to *Mycosphaerella fijiensis* in the resistant Musa accession Calcutta 4 using suppression subtractive hybridization.

LIBRARY: SSH Calcutta M. fijiensis library

EST#: 2C1 BMCIBE

DNA\_TYPE: cDNA

PUBLIC:

COMMENT: Raw sequences were clear up, from vector and cloning adaptors, with the program CLC Genomics Workbench (CLC bio, Denmark).

SEQUENCE:

TCTTGTATTCAAACCTTCACATCTCTGTTATTANNATCAATTTCCAGTGCTTTCTTGATGT

CCCCTTCTGCCAAATCCAGATCAGCTAGCTGCATATAAGCTTGTGCCCTAT

||

TYPE: EST

STATUS: New

CONT\_NAME: Santos E

CITATION: Identification of differentially expressed genes in response to *Mycosphaerella fijiensis* in the resistant Musa accession Calcutta 4 using suppression subtractive hybridization.

LIBRARY: SSH Calcutta M. fijiensis library

EST#: 2C5 BMCIBE

DNA\_TYPE: cDNA

PUBLIC:

COMMENT: Raw sequences were clear up, from vector and cloning adaptors, with the program CLC Genomics Workbench (CLC bio, Denmark).

SEQUENCE:

CACTTGAGATGGGTGCGCTTGCTATACCCATCATCAATTGAAGATGTGAATTCAANGATT

ACTAGCTCCTATCAGTATAAGACTCCAGAGAATCCTTGGATGAGTATGACA

||

TYPE: EST

STATUS: New

CONT\_NAME: Santos E

CITATION: Identification of differentially expressed genes in response to *Mycosphaerella fijiensis* in the resistant Musa accession Calcutta 4 using suppression subtractive hybridization.

LIBRARY: SSH Calcutta M. fijiensis library

EST#: 2C7 BMCIBE

DNA\_TYPE: cDNA

PUBLIC:

COMMENT: Raw sequences were clear up, from vector and cloning adaptors, with the program CLC Genomics Workbench (CLC bio, Denmark).

SEQUENCE:

ACTTGTGTCGTCGGCAGCCAAACGCCACCGCCTGCGCGATGTCGGAATGCTCCAGCAGCA  
CCGCGTCCACCTCTATCGGAGAGATCTTCTCGCCTCCGCGGTTGATGAGCTCCTTGATGC  
GACCGACGAGGTGGAGGTAGCCATCGCTGTCCAGGAAGCCGACGTCGCCGGTGTGGAACC  
ATCCGAAGGCAAAGGCCGCTTGTTCGCCTCCGGATTGTTCTTGAGCCCCGGGTCACGT  
TGGGTCCGCG

||

TYPE: EST

STATUS: New

CONT\_NAME: Santos E

CITATION: Identification of differentially expressed genes in response to *Mycosphaerella fijiensis* in the resistant Musa accession Calcutta 4 using suppression subtractive hybridization.

LIBRARY: SSH Calcutta M. fijiensis library

EST#: 2C8 BMCIBE

DNA\_TYPE: cDNA

PUBLIC:

COMMENT: Raw sequences were clear up, from vector and cloning adaptors, with the program CLC Genomics Workbench (CLC bio, Denmark).

SEQUENCE:

AGTAATTAGGAAGAGTAGTAGTGGAGAAAGTTCA  
TCTGTTACGCCTTTTGTGATCTACGAGGATGTTTTCCCTCTTGATGCATCAAGAAGAATC  
TAACATCCATCTATTAACATTCTTGCAAGCAAACCTGGAGATTCTTCTCGGCAAATGTT  
TTGTTCAATTACAATGAAGATCATCAAGTTCTAATGCTCCAAGAATATGCAACCCTGCAGA  
TCTGATATTTGTAGGTAAGCCAATAAGATGTTCTGATCATGGAAAAATTACTACTCCTGT  
ATTTGCAGGATTGAAACAATTTCTATATGGAATGCTTGACTAATTCGTGGAGTTCAGCTG  
GCAAACAAGATCATCAAACCATGT

||

TYPE: EST

STATUS: New

CONT\_NAME: Santos E

CITATION: Identification of differentially expressed genes in response to *Mycosphaerella fijiensis* in the resistant Musa accession Calcutta 4 using suppression subtractive hybridization.

LIBRARY: SSH Calcutta M. fijiensis library

EST#: 2C9 BMCIBE

DNA\_TYPE: cDNA

PUBLIC:

COMMENT: Raw sequences were clear up, from vector and cloning adaptors, with the program CLC Genomics Workbench (CLC bio, Denmark).

SEQUENCE:

ACCATGCAACAGCTACC

CGGCAATGACCGACTCAGATCGAAAATACATTACGTAGACATTAACCTGACTCCAGTGTG

ATGACAAGTCTCTCATACGTGGAAGACGAGATACCCCATGTAGAGAAGAAGACCTGCTAC

CGTCAAGGAGATGACGGTGACGCTCCTCGGCATCCTCCACCATCGCTTCTCAGAAACAT

GGCCTCGTAGATAGGCCAGCAGTTGGCGGCGACGAAGCCCGACAGGAACAGCTGCGCGAA

CTGCTCGTCGAGGAACCCCTCCGTCGTCGCAGCCCTCGCGATCCCTACCACCAAGGAGCT

CAGGTTGACGGCGGCCACGGTCCGAGTGCCACGAAGAACGGCGACTGCACTCCCAGGTC

GAGGACCCCTCTCTCGT

||

TYPE: EST

STATUS: New

CONT\_NAME: Santos E

CITATION: Identification of differentially expressed genes in response to *Mycosphaerella fijiensis* in the resistant *Musa* accession Calcutta 4 using suppression subtractive hybridization.

LIBRARY: SSH Calcutta *M. fijiensis* library

EST#: 2C10 BMCIBE

DNA\_TYPE: cDNA

PUBLIC:

COMMENT: Raw sequences were clear up, from vector and cloning adaptors, with the program CLC Genomics Workbench (CLC bio, Denmark).

SEQUENCE:

ACTCAACAGCATTCTCTCGTGATAAAACAAATTTGGGATAGAGAAGAACACAAACAAAA

TATACATGCCCATTTTCATGCATCAAAAGCCGAGGTAGTGTGTAGCTATTACTCTCAACAT

AAGAAAAAAATATCCTAACATCTTATTAATGGAAAAAAATCCACTCCAGAAGCTTAC

GTTATGCTATTTACATTTTAAACAAACCTTCTCTCCTCGTCTACCAAGGCATGGGGC

ACATCGGATTGTCTTTTCTTCTGGAGCGCTTCTGCTCATCGAGTA

||

TYPE: EST

STATUS: New

CONT\_NAME: Santos E

CITATION: Identification of differentially expressed genes in response to *Mycosphaerella fijiensis* in the resistant *Musa* accession Calcutta 4 using suppression subtractive hybridization.

LIBRARY: SSH Calcutta *M. fijiensis* library

EST#: 2C11 BMCIBE

DNA\_TYPE: cDNA

PUBLIC:

COMMENT: Raw sequences were clear up, from vector and cloning adaptors, with the program CLC Genomics Workbench (CLC bio, Denmark).

SEQUENCE:

```
ACAAGCTTTTTTTTTTTTTTTTTTTTTTTTTTTTTTTTACATGAAATAATAATAATAGATAAT
AATCTTTCTCATTTTAGTTTGTCTACACACATTAATTTGTGCGAATCCAGCAAACCTAAGAA
TATAATCACCCAACAACCTTACTCATTTGGAGATTTCTTTGCCCATGTAAGATGATATAT
ACAAGAAAATGAAGTTATTTTCTCTTGCTGATAATTTGTGATATGATCCTACCAAGTTCT
TCACCTGAGTCCTCCTGAACATGATGCCCTGCCATAGCGAGCTCCACCAGCTTGTGATTT
GAAGCTTTGCAAATTCCTCGACACCATCATACCTTAGCCAACGATCTCTCATACCCAG
CAAATTGTGGTGCGAGTTTTCCATGTCTCACTAGCTAGTGTGTCCTCATGGCTTCAACA
TAAGCCTTCAGCTCCTTCTTCATGGCTCCACTTAATGCATTTAGAGCAAACCCAGAAGAA
CCAGAAGTGAGGTATGGCCTTCTGTAAACCATCGCATCTTCTTCTTTCATCATGTATGGT
CCACAACCTGGTCAATGCCCTATCACTAGCACTGANAGGATCCTGGGAGATAATTAGACCC
AACAAAAAGTTGCTGAACAGAGCCNAGGATGAGGGCAGCTTCACATGATTCTCCATCA
```

||

TYPE: EST

STATUS: New

CONT\_NAME: Santos E

CITATION: Identification of differentially expressed genes in response to *Mycosphaerella fijiensis* in the resistant *Musa* accession Calcutta 4 using suppression subtractive hybridization.

LIBRARY: SSH Calcutta *M. fijiensis* library

EST#: 2C12 BMCIBE

DNA\_TYPE: cDNA

PUBLIC:

COMMENT: Raw sequences were clear up, from vector and cloning adaptors, with the program CLC Genomics Workbench (CLC bio, Denmark).

SEQUENCE:

ACATGTTGGATTCAACAGCCAAAGTCATAGGAGGCGAGTCCTGTAGCTCCGGTCCATTA  
AGTCTACTGTTGTTGTCAAAGCTCTGAAGAGGAAAGTTTGCAAATGGTCCATCAATTGGA  
ATGGTCCACAAAGATCATTGTTTCAAACATCCAAGACTTTGAGATTTGAAAGCAAAACA  
AGCTCTCTGGGAATGGCTCCGGAAAGCCTGTTGTTGTCTAGCCGCAAGAATCTAAGTGAC  
TTCAATTTGGCAAAGGACTTAGGAATCTCTCCTGCAGTCGGTTCTCATACAAATCCATG  
CTGATGAGGCTCTCAAATTGCCCAACTCCGCAGGGATTTTGCCCTCGAAGTTGTTCTCTG  
TAGAGCTCCAGGTATTGCAGGTGCTCCAGGCGGCTAAGCTCGGAGGCGAGAGGGCCGGAG  
ATGTTGGAATTTCCCAAATCTATGCGAATAACACGGTTCTGGGAGTCGCAGGTGACATGG  
AACCAGGTGCAGGGGTTGACGAGGGTGGGATCCCAGCTCTGCAGCACGTTGGTGGGATCG  
GTGAGCCGCGTCTCCATGCGTGCAACGCCTCTCCCTCGGAGTTGCTGGAGGAGGCCGGC  
GAGGCGACGAGGAGGAGGAGGAGGATGTAGGAGAGGCAGGGCAGCGCCACCGGAAGAAGA  
GCCATCCGAGAAAGAGAGCAGGAATGGAGGAGGGCGGCAGGT

||

TYPE: EST

STATUS: New

CONT\_NAME: Santos E

CITATION: Identification of differentially expressed genes in response to *Mycosphaerella fijiensis* in the resistant *Musa* accession Calcutta 4 using suppression subtractive hybridization.

LIBRARY: SSH Calcutta *M. fijiensis* library

EST#: 2D1 BMCIBE

DNA\_TYPE: cDNA

PUBLIC:

COMMENT: Raw sequences were clear up, from vector and cloning adaptors, with the program CLC Genomics Workbench (CLC bio, Denmark).

SEQUENCE:

AGGTCCAAATTGAGGGAAACAGTGTGGGATTCCTCC  
ACTGATAGGTTTCTTCCATTGAACACAGCATCTGGCCGAACAAAGAGAAGATCCTTGCC

ATTCGAAACCTTCCAAGATGTAATGCAGCCTCCGAACAGATAAAATCTCAGCCTCACTGCC  
ATGAGGGGAAAGCAGGGAGACCTTGGGAAGCCCCATTCCCCTCCGAAATCTTGATCCCC  
TGGGCATAAGTCTTTTGTCTAAGCTCGCAAACGCGATTCTGACGATCTGAAACGGAGC  
CGTCGATCTGCGCTCCATGGGGTTAGGGCTCTTCCGAGGGGCAGGGAGGCCATCGCCACG  
CTCGTCGCCATTGCTCCACCAA

||

TYPE: EST

STATUS: New

CONT\_NAME: Santos E

CITATION: Identification of differentially expressed genes in response to *Mycosphaerella fijiensis* in the resistant *Musa* accession Calcutta 4 using suppression subtractive hybridization.

LIBRARY: SSH Calcutta *M. fijiensis* library

EST#: 2D3 BMCIBE

DNA\_TYPE: cDNA

PUBLIC:

COMMENT: Raw sequences were clear up, from vector and cloning adaptors, with the program CLC Genomics Workbench (CLC bio, Denmark).

SEQUENCE:

ACAGCATCATCTGAAGGAACTGGAGGGTCATCGGACGTGCCATTAGAACTAGTTCCGTT  
CCTTCTTGACATTCATCTCACTGAAGGTTCTTTTCCTTGCAACGATTCCAACATCTCT  
GTCTCCTTGACCTTCTCCCCCTTTTCTCTATAGTTTCTTTTCCTTCTCTGGCACTTCA  
GTATCACTTGTAGAAGGCTCAACCGGTGGTGGCAGCTCACGACCATTTAACCGGCAATAT  
ACTCTTTCAACGGTTTCGCTGATCTCCTTCCCAAGCCATTATTGTCAACAATTAGCTCC  
CAAACAGCTCTAGATGCCTTCTCAAGCACCGGAGTTTCTAGTTCTCGCCGAGTGCAATCA  
AACAACTCTCTTTGTCTGTTTCTCTGCACCAGGAGTATTAAGGACCTTACTTTGCTCG  
ACCATCGTGATTGTGTTATTCTTAAGCTCTTCATTGGCCTTCAACTGGTTAATAATCTTC  
AATCTAATGGCATCGATTGTCCCATCATTCAATTAACGATTCGAGT

||

TYPE: EST

STATUS: New

CONT\_NAME: Santos E

CITATION: Identification of differentially expressed genes in response to *Mycosphaerella fijiensis* in the resistant Musa accession Calcutta 4 using suppression subtractive hybridization.

LIBRARY: SSH Calcutta M. fijiensis library

EST#: 2D5 BMCIBE

DNA\_TYPE: cDNA

PUBLIC:

COMMENT: Raw sequences were clear up, from vector and cloning adaptors, with the program CLC Genomics Workbench (CLC bio, Denmark).

SEQUENCE:

ACGAAGGGGCTTGTCTGATGGTCTCTTTGGTTCTGGATCAGGTCCAGAGCCTCGAGAAG  
GGTTGGGCCCTATACTGAG

||

TYPE: EST

STATUS: New

CONT\_NAME: Santos E

CITATION: Identification of differentially expressed genes in response to *Mycosphaerella fijiensis* in the resistant Musa accession Calcutta 4 using suppression subtractive hybridization.

LIBRARY: SSH Calcutta M. fijiensis library

EST#: 2D6 BMCIBE

DNA\_TYPE: cDNA

PUBLIC:

COMMENT: Raw sequences were clear up, from vector and cloning adaptors, with the program CLC Genomics Workbench (CLC bio, Denmark).

SEQUENCE:

ACAAGCTTTTTTCTTTTTTTTTTTTTTTTTTTTGCTAATTTGTTTCACCTCAATACCAT  
AAACATATCCAGTATCGTATGCTTCCCTTATTCAAAAAAGAAATACACAGGCACAAAAAC  
TCCTAAACATGCATAAAAGATAAAAAGGACGCGAGCCAAATCATAAACTCGTCGAGTCGC  
TTAGCTTCTGCTGATACGAGGCTTAATCAACTTCTCAATCTTTGGCCCTGCACCACTG  
CTGCCTCCGGTGCTGGGAATGTCCTCGTCCATACCACCGCCATTCCACCGCCAGCGCCC  
TGATACATCTTTGCGATGATCGGGTTGCAGATGCTCTCCAGCTCCTTCATCCTATCCTCG  
AACTCGTCGGCCTCGGCCAGCTGGTTGCCGTCCAACCAGCTGATCGCCTGCTCCACTGCG  
TCTTCGATCTTCTTTTTGTCTCCGCCGCGCAGCTTCGCAGCTATCTTCTCGTCCCTAATG



GTGTTCCATGTTGTAGGAATAATTCTCCAAGGCGTTCTTCGCCTCGATTTTCTTCTTG  
TGCTCCTCGTCTCCGCCTTGT

||

TYPE: EST

STATUS: New

CONT\_NAME: Santos E

CITATION: Identification of differentially expressed genes in response to *Mycosphaerella fijiensis* in the resistant Musa accession Calcutta 4 using suppression subtractive hybridization.

LIBRARY: SSH Calcutta M. fijiensis library

EST#: 2D7 BMCIBE

DNA\_TYPE: cDNA

PUBLIC:

COMMENT: Raw sequences were clear up, from vector and cloning adaptors, with the program CLC Genomics Workbench (CLC bio, Denmark).

SEQUENCE:

ACTCAGCAACTTGCTTTGGTGTGGCTTTCTCTGGGCACTCAGCGCCCGGGGTCACCATGC  
TCGGCTTCAGGAGGATGCCTTCGAACATGACATTGTTCTCGGCCAGGTAGAAGAAGACCT  
CAGCCCATACTTTCTGTGCAACCTCGAAGGTCCTCTCGATTCCGTGGTCTCCGTCAAGCA  
GGATTCTGGCTCCACAATCGGCACCAACCCATTGTCTTGTGCGATGGCAGCGTATCGAG  
CCAAGCCCCAGGCAGCTTCCTTGACTGCAAGAGTCGATGGGCCATTTGGAATGCTGACCA  
CTGT

||

TYPE: EST

STATUS: New

CONT\_NAME: Santos E

CITATION: Identification of differentially expressed genes in response to *Mycosphaerella fijiensis* in the resistant Musa accession Calcutta-4 using suppression subtractive hybridization.

LIBRARY: SSH Calcutta M. fijiensis library

EST#: 2D10 BMCIBE

DNA\_TYPE: cDNA

PUBLIC:

COMMENT: Raw sequences were clear up, from vector and cloning adaptors, with the program CLC Genomics Workbench (CLC bio, Denmark).

SEQUENCE:

ACGGTCCTGACAGAAGAATTTTCTTGCCGGAAGGCCTCCTGGACCGATCTGATATTCCAG  
AGTATCTCAATGGAGAAGTTCCGGGAGATTATGGCTATGATCCTTTTGGGCTGAGCAAGA  
AACCTGAGGATTTTGCCAAATACCAAGCTTATGAGCTCATCCATGCAAGGTGGGCAATGC  
TTGGTGCAGCTGGCTTCATCATCCCAGAGGCCTTCAACAAATTTGGTGCAAACCTGTGGCC  
CTGAGGCTGTCTGGTTCAAACCTGGTGCTCTTCTCCTGGATGGGAACACGCTGAACTACT  
TTGGGAAGAGCATTCCAATCAATCTTGTGGTTGCTGTCATTGCCGAGATTGTGCTTGTG  
GAGGTGCTGAATACTACAGAATCATCAATGGACTGGATTTGGAGGACAAGCTGCACCCTG  
GAGGTCCATTTGATCCACTGGGGCTGGCGGATGATCCAGACCAATTTGCATTGCTCAAGG  
TGAAGGAGATCAAGAACGGGCGACTCGCGATGTTTGCATGCTGGGGTTCTTCTGCAGG  
CCTATGTCACTGGGGAAGGACCAGTGGAGAACCTCACCAAACATCTGAGTGACCCATTTG  
GAAACAATTTGCTCACTGTCATCTCTGGAGCAGCTGAAAGAGCTCCAACCCTGTGATCTC  
CCAGCCGTGTTTCTTCTTCCATGATCTGCATGCCATGTTGACCACTTAGATCATTAT  
CGCATTGTAAAATGTTATTTGATACTTACAGTAATTTCTGTTTCAGCGGANAAAAAAAAA  
AAAAAAAAAAAAAAAAANGCTTGTACCTGC

||

TYPE: EST

STATUS: New

CONT\_NAME: Santos E

CITATION: Identification of differentially expressed genes in response to *Mycosphaerella fijiensis* in the resistant *Musa* accession Calcutta 4 using suppression subtractive hybridization.

LIBRARY: SSH Calcutta *M. fijiensis* library

EST#: 2D11 BMCIBE

DNA\_TYPE: cDNA

PUBLIC:

COMMENT: Raw sequences were clear up, from vector and cloning adaptors, with the program CLC Genomics Workbench (CLC bio, Denmark).

SEQUENCE:

ACCTGAAGATGTATCAGGTTTTTCGGACACTCTTCTGAGAACAATTATGGGCTGCAGAGG  
TTCTTTAGGTCTCCTCTTTTGCAAAGGAGGTTGGAATGATCCTTGAAGAATAAGGATAG

AGATCTTTGTAGGAGTTCCGGATGGTGCCTTCCGCTACTCCGGTTGCCAGGGATATGTCT  
TTGAGAGGCTTCTTGTCATCTGATAACTGTGTTATCATGTAAATGATAGCCGCTGCAATT  
GATATAGGACTTCTCCTTATATCAAGCTCTTCTGACTTCTGGACTGCTTCTGAGCAGCT  
TTAACTGCTTGATTTGTCATACCAAGATGTGAACAAAAACGTCTCAGAAAATCTCCAGCA  
TGAATTGTTCCCATCTCCATTGACTGTCCCATCTCAACTTCAAGCTGTTTTACAATGAAC  
TCCTTAGCCCGACCAATTTCTTTCTTTCAGCTCCATTGGCAACAGAGCAAATTTCTTTC  
ACAGTTCGAGGCCTGTCTTCTGTGCGCAAGCAATGTATAGACAAGCAGCTAAAATTGCA  
TCTTGAT

||

TYPE: EST

STATUS: New

CONT\_NAME: Santos E

CITATION: Identification of differentially expressed genes in response to *Mycosphaerella fijiensis* in the resistant *Musa* accession Calcutta 4 using suppression subtractive hybridization.

LIBRARY: SSH Calcutta *M. fijiensis* library

EST#: 2D12 BMCIBE

DNA\_TYPE: cDNA

PUBLIC:

COMMENT: Raw sequences were clear up, from vector and cloning adaptors, with the program CLC Genomics Workbench (CLC bio, Denmark).

SEQUENCE:

ACATACTTCACAAAGCAAGCAAAGCCAGTGATGACATTAGTGGATGATGCAGCACTTCTC  
AGACACTTCCAAGTTAGTCACCGCTACATAGTCACACCATGACATACTTACACATATGCA  
CACCATGACAGGAAGTAACACATTTGTTCTGACAGAAAAGAACTAAAACACTACAGGAGGT  
CAAGCTTCGTATGCCGAAATCCCGATTGAGAAGGTGTAGTCATGTCTAAAAGAGGTAT  
GCCATGCCAGCTTGCCCTTCGAAGAGTGAATAAGGATGATCACCCTGTGCATCTTCCCT  
TCGGCAATCAATTTATTAGCTCTATCTAGCAGAAAGCAAGTAAAGGCTTTTGCTTGATAT

A

||

TYPE: EST

STATUS: New

CONT\_NAME: Santos E

CITATION: Identification of differentially expressed genes in response to *Mycosphaerella fijiensis* in the resistant Musa accession Calcutta 4 using suppression subtractive hybridization.

LIBRARY: SSH Calcutta M. fijiensis library

EST#: 2E1 BMCIBE

DNA\_TYPE: cDNA

PUBLIC:

COMMENT: Raw sequences were clear up, from vector and cloning adaptors, with the program CLC Genomics Workbench (CLC bio, Denmark).

SEQUENCE:

AGAGAGAGCCCATCGAAGTTCGCAGGCAGCGGAAGA

GGGAAAAGGGCGTTATGGAGGGAGGAAAGAAGCAGGACGCCGGTGCCCCCGCCAATTCGT

CGTCCTCCTCCTCCACTTCTTCTCCTCGCCCTCCGGCTTCTTCAGCAGTGTCTTCCCTC

CTCCTTCCACGGTGATGGCTAAGGATTCATCGCAGAGTGACTTGT

||

TYPE: EST

STATUS: New

CONT\_NAME: Santos E

CITATION: Identification of differentially expressed genes in response to *Mycosphaerella fijiensis* in the resistant Musa accession Calcutta 4 using suppression subtractive hybridization.

LIBRARY: SSH Calcutta M. fijiensis library

EST#: 2E2 BMCIBE

DNA\_TYPE: cDNA

PUBLIC:

COMMENT: Raw sequences were clear up, from vector and cloning adaptors, with the program CLC Genomics Workbench (CLC bio, Denmark).

SEQUENCE:

ATGAATGATGTCAACAGCCAGAAAGCTCTGGAAGAG

TGGCGGATGCGGAAGATGGAACGAGCAAGACAACGGGAAATTGAGAAAATGGAACATTG

ACATCTTAGTTTGGTGGTTGCATTTGAGATCTAAGAAGAATGCTACTAAAATGTATACGT

ATGTGCATCAAAGCAGCGGCAGCTCTTTGAAGTTTATTTATTTACTGTCTGTCTGTCT

GTCTGTATTGTTAATTTGAGTGAACACAAATCAAGCTGTTATTGTAAATCTAAAGATAAG

GGACTTTATATGTAGTATATGTTCAACAGGACTTTATATAATTGTGCTGTAATTTCTTTT

GACTGCTAAAAAAAAA

||

TYPE: EST

STATUS: New

CONT\_NAME: Santos E

CITATION: Identification of differentially expressed genes in response to *Mycosphaerella fijiensis* in the resistant Musa accession Calcutta 4 using suppression subtractive hybridization.

LIBRARY: SSH Calcutta M. fijiensis library

EST#: 2E3 BMCIBE

DNA\_TYPE: cDNA

PUBLIC:

COMMENT: Raw sequences were clear up, from vector and cloning adaptors, with the program CLC Genomics Workbench (CLC bio, Denmark).

SEQUENCE:

CAAGCTTTTTTTTTTTTTTTTTTTTTTTTTTTTTTTATGATATTAATCCAGTCACAAATGCCT  
TTCATATGGATAGGATGTTACAAGGGATATATCTGTGGCAACAAAGCATGTCACGATGAG  
CTGCAGCACCCCTCAGTGGAACCTGAAGCTGGTCAAGATGTTGTTGTGCACAGGGTCGGCC  
AAGTGATCCAACAGGTTCTGGAACGGCCCAACTCCGGTCAACGCCGCTGCGCAAAGTAA  
CCCAGGATGGCCAGCATGGCCAGCCTCCCATTCTTCACCTCCTTCAGCTTCAGATCGTTC  
ATCGACTTCTCGTCCTTCCCGAAGCCGAAAGGGTTGAAAAAAGGTCCTCCAGGGTAGATA  
GGGTTTCCCGACCCCCCAGCCACTTCTCGAAACCTAAAAAGT

||

TYPE: EST

STATUS: New

CONT\_NAME: Santos E

CITATION: Identification of differentially expressed genes in response to *Mycosphaerella fijiensis* in the resistant Musa accession Calcutta 4 using suppression subtractive hybridization.

LIBRARY: SSH Calcutta M. fijiensis library

EST#: 2E4 BMCIBE

DNA\_TYPE: cDNA

PUBLIC:

COMMENT: Raw sequences were clear up, from vector and cloning adaptors, with the program CLC Genomics Workbench (CLC bio, Denmark).

SEQUENCE:

TGTTCCCGGCCAAGGTACCTCAGCTGATCTTCTCCTCTGAGGGGCTTTGA

TCCCAAAGAGNTCTCCAAACGATGGAACCGATAAAACACGCTCTGTTGCCACCCCTGCT

GACTTCAACTTTGCGATGAACTCATG

||

TYPE: EST

STATUS: New

CONT\_NAME: Santos E

CITATION: Identification of differentially expressed genes in response to *Mycosphaerella fijiensis* in the resistant *Musa* accession Calcutta 4 using suppression subtractive hybridization.

LIBRARY: SSH Calcutta *M. fijiensis* library

EST#: 2E6 BMCIBE

DNA\_TYPE: cDNA

PUBLIC:

COMMENT: Raw sequences were clear up, from vector and cloning adaptors, with the program CLC Genomics Workbench (CLC bio, Denmark).

SEQUENCE:

AAGATTTTCGGA CTTCGGCATGGCCAGAATATTTGGAGGGGATGAGACGGAAGTAAATACC

ATGAGAGTGGTGGGAACATATGGTTACATGTGCGCCGAATACGCCATGGACGGAATCTTC

TCGGTGAAATCTGACGTGTTAGCTTCGGCGTGCTGGTGCTCGAGATCGTAAGCGGCAAA

AAGAACC GCGGCGTTTATTACTCCGGTCGCCACCTAAATCTTCTGGCATAACGTAAGTAGA

AGAAATTATAATCTTTACATACGATTGATTCCCTTTATGGTGATGATGCCATCGATACTT

GCGATTGATCTTAGACGTGGAGTCTCTGGAAAGAAGACAGAGTGCTGGAAATGGTGGACG

AATCGATCGGGGAGTCCTTCCCCACGGATGAAGTCTTGAGGTGCATAAAGGTCGGGCTTT

TATGCGTTCAAGAGATGCCAGAAGACAGACCGACGATGTCTTCAGTGCCGTTGATGTTGG

GGAGCGACGGTGCTCTCCTGCCGCAACCTGCTCACCCAGGTTTTGTGTCCGCCAGGTGCC

CGATCGAAAATGGATTCATCGATAAGTAAGCAGGAGTCGATGTCCATAAACNAACGTATC

GGTCACAATGTTCAAGGTCGGTTAGATCAACTAAAAACGT

||

TYPE: EST

STATUS: New

CONT\_NAME: Santos E

CITATION: Identification of differentially expressed genes in response to *Mycosphaerella fijiensis* in the resistant Musa accession Calcutta 4 using suppression subtractive hybridization.

LIBRARY: SSH Calcutta M. fijiensis library

EST#: 2E7 BMCIBE

DNA\_TYPE: cDNA

PUBLIC:

COMMENT: Raw sequences were clear up, from vector and cloning adaptors, with the program CLC Genomics Workbench (CLC bio, Denmark).

SEQUENCE:

```
GCCAAACCACAACATCACAGTCTACTAATACTGCAA
GACCCAAAATGACGCCAGACAACAGACAAGTTCCAACTTAAAGATAACCAAAGCAGCAG
ATAACTACGAAGCCCAGCCCTCCGATCGCGGCAAGCGAACGACCGCCTTAGCTCCTCCAG
TACCTCGGCCG
```

||

TYPE: EST

STATUS: New

CONT\_NAME: Santos E

CITATION: Identification of differentially expressed genes in response to *Mycosphaerella fijiensis* in the resistant Musa accession Calcutta 4 using suppression subtractive hybridization.

LIBRARY: SSH Calcutta M. fijiensis library

EST#: 2E8 BMCIBE

DNA\_TYPE: cDNA

PUBLIC:

COMMENT: Raw sequences were clear up, from vector and cloning adaptors, with the program CLC Genomics Workbench (CLC bio, Denmark).

SEQUENCE:

```
ACCTTTGGAGAAAGTTAAGGAGATGAGTAACTTATCTTTAATGAGAACAGTGGAGAGTTG
GCTAAGGAAGGAGAGGGATGAAGACAGGAGGAGGAGACAGGAGAGAAAGGCAATTGGCCT
TGCAGAACATGAAAAGCAACTCGAGGGGACACGGGTGACAGGGGATCCAGCCCGGAGTGC
AGTCCGAGTAATGAACAATGGTTGGGCAGCCGGGAGACTACATTCAACTGTAGCAGGTCA
```





COMMENT: Raw sequences were clear up, from vector and cloning adaptors, with the program CLC Genomics Workbench (CLC bio, Denmark).

SEQUENCE:

ACTCGTGGGCTTGCCCGGTGGCGTGGACGCTGTATGGGCTCGTTGCCTCACAGTTCGGCG  
ACAACCAAATAATGGAGGGTGGTGGAGTGGAGGAATACGTCAGGCGATTCTTCG  
GCTTCCGGCATGACTTCTGGGCGTCGTGGCTGTTGCAGTGGTCGGCTTACCGTGCTCT  
TTGCTTTCGTCTTCGCCTTCTCGATCAAGGTGTTCAACTTCCAGAGAAGATGAGCCACCA  
CATTCTTCTCAAATCCACCGAGCAATGTCCATATCACGAGATATATATGGAATAATCC  
ATCTTTCTTTTGTGTATAGGATAATTATCCTCCCTAAACATGTATTCCTTTGTTGTCAA  
TCCACAAATGT

||

TYPE: EST

STATUS: New

CONT\_NAME: Santos E

CITATION: Identification of differentially expressed genes in response to *Mycosphaerella fijiensis* in the resistant *Musa* accession Calcutta 4 using suppression subtractive hybridization.

LIBRARY: SSH Calcutta *M. fijiensis* library

EST#: 2E11 BMCIBE

DNA\_TYPE: cDNA

PUBLIC:

COMMENT: Raw sequences were clear up, from vector and cloning adaptors, with the program CLC Genomics Workbench (CLC bio, Denmark).

SEQUENCE:

GAGGAACTTCGGACAATTCCTGGGAGAACTGCACTAGAACTTCGTGCAGAGGCAAGTATA  
TAGCCTTTTTCTTTTCAGCAGTTCTGCATAGCTGAAATATGTTATACTTGAATTTCCA  
ATTTGCAGGTGGCTCCTATGACATCTAGTTTGAAAAATCAGAGGCTTGAAGTGAATGAAA  
GAGTCACCAAATATCAGAACTTGGGATTCGAGTTTGATAATAAAGTATTTT

||

TYPE: EST

STATUS: New

CONT\_NAME: Santos E

CITATION: Identification of differentially expressed genes in response to *Mycosphaerella fijiensis* in the resistant Musa accession Calcutta 4 using suppression subtractive hybridization.

LIBRARY: SSH Calcutta M. fijiensis library

EST#: 2F1 BMCIBE

DNA\_TYPE: cDNA

PUBLIC:

COMMENT: Raw sequences were clear up, from vector and cloning adaptors, with the program CLC Genomics Workbench (CLC bio, Denmark).

SEQUENCE:

```
ACCCGCTTAGTATAATAAGTGGCGGCACAACCTGCGAAGATTATGGTGGCAGCAAAAGATA
ACTTTCTTGGAAAATATATCTACAAAGACACCATTGCTCGAAATATTGCAGCTGTTATAT
ATAGAGATGAGAAGGAAATACAAAAGACAGCAGTTAAACAATACCGTGTTTTGCGATCTG
CTACATCATTTAGATATGGTTACAAACTTGTTGAAAATAACAATTTGAGGGCTGCAATTT
CTACTTCCAATGTCATTGAACTTCCAACACAGGAAGAGCTTAAAACCGTCCTTGACAAGG
TGAAAGACTTCTTCGCAATGCTACCAGTGATGCTAAAGAGTCATTTGAAAGCTTACAT
CCTTGGGTTCACTAACTGATGAGGAACCAGAATCACAATCCGAAGTGAAGAGCTGAAGGA
ATATGGACTTCTGACATCAAGATGGCCAAAGATCTCTGTGAGCTGATATCTTTTCTGATG
TTATCAAATCTTTACCTTCGTTGTTTCGT
```

||

TYPE: EST

STATUS: New

CONT\_NAME: Santos E

CITATION: Identification of differentially expressed genes in response to *Mycosphaerella fijiensis* in the resistant Musa accession Calcutta 4 using suppression subtractive hybridization.

LIBRARY: SSH Calcutta M. fijiensis library

EST#: 2F2 BMCIBE

DNA\_TYPE: cDNA

PUBLIC:

COMMENT: Raw sequences were clear up, from vector and cloning adaptors, with the program CLC Genomics Workbench (CLC bio, Denmark).

SEQUENCE:

```
CACCGCCGAGGAGCAGGGGATTCTCGGTCCCAAAA
```

TTCACAATCCCATCGAGGAGACCTCCCACATCGAAGTCGAGGGAGGAGCTGCCGACGGTC  
TGGTCGAGAGCTTGCTCGTAGGTCAAGGCCTTGGCGAGGCCACCAGCACAAAAATCGGG  
GAGAGGGCTGCAAGCTTGGGGAGCCTGAATTGGGGGAGCCGCCTAGGCTCGGGTCTCCTC  
TCGAGGGAGGGAGTGGCCTTGTGGAGTGAGGCTACTGGTGCCAGGCCTGCTGCATTGAGG  
ACTTGCATGGCATAATTATC

||

TYPE: EST

STATUS: New

CONT\_NAME: Santos E

CITATION: Identification of differentially expressed genes in response to *Mycosphaerella fijiensis* in the resistant *Musa* accession Calcutta 4 using suppression subtractive hybridization.

LIBRARY: SSH Calcutta *M. fijiensis* library

EST#: 2F3 BMCIBE

DNA\_TYPE: cDNA

PUBLIC:

COMMENT: Raw sequences were clear up, from vector and cloning adaptors, with the program CLC Genomics Workbench (CLC bio, Denmark).

SEQUENCE:

ACGTGAACTCTCCAGGAGGATCAGTTACAGCTGGCATGGCTGTATTTGACACAATGCGAC  
ACATTAGGCCTGATGTTTCTACTGTTTGTGTTGGTCTGGCAGCCAGTATGGGTGCTTTCA  
TTTTGAGCTCTGGCACAAAGGGGAAAAGATACAGCTTACCAAATCCAGGATTATGATTC  
ATCAACCTCTTGAGGAGCTCAGGGTGGGCAAACCGATATAGACATCCAGGCAAATGAAA  
TGCTTCATCACAAGGCCAATTTGAATGGATACCTGGCATAACCACACTGGTCAAAGCTTTG  
AAAGGATCAACCAAGACACTGATCGGGACTACTTCATGAGTGCCAAAGAAGCTAAAGAAT  
ATGGTTTGATCGATGGTGTGATCATGAATCCTCTCAAAGCTCTGCAGCCACTACCAGCCT  
CGCAAGAGTGATTGCCAATCAGCTAAATGCCTTGTTAGATGTTACTTCTGTGGCCATAAG  
CGAGGAAGGATGATTCTACGAACAAATTGCCAAGAGAGCAGTGTTTTTGTATTGTGT  
TGCAAAGT

||

TYPE: EST

STATUS: New

CONT\_NAME: Santos E

CITATION: Identification of differentially expressed genes in response to *Mycosphaerella fijiensis* in the resistant *Musa* accession Calcutta 4 using suppression subtractive hybridization.

LIBRARY: SSH Calcutta *M. fijiensis* library

EST#: 2F4 BMCIBE

DNA\_TYPE: cDNA

PUBLIC:

COMMENT: Raw sequences were clear up, from vector and cloning adaptors, with the program CLC Genomics Workbench (CLC bio, Denmark).

SEQUENCE:

```
ACAGCAACACCCCAACCATCATGGACACATTCAAATGCAGATATCATGGCACTTGTGCTG
CCAGAACATTCGATGCTGCGATCGACTCCACCGTTGGTCATTTAGCAAGCACCTCTTGA
ACTGGTCTGTCATAGTCTGCTGGATTCAAACTCGGTACACCAAACCTTCTTAGCTTCC
TCAAATCTCTTAGGATTAATATCAACACCAATTATTCTTGATGCCCTGAGGCCCTTGCC
CCTTCAGCTGCTGCAAGGCCTACAGCTCCAAGGCCAAAAACAGCCACAGTTGAACCTTA
GGTGGTTTTGCAACATTCACAGCAGCACCATAACCTGTTGAAATGCCACAGCTGATGACA
CAAACCTTGTGCGAGAGGAGCCAAAGGGTTGATCTTGCAACACAGCCGACATGGACGACG
GTGT
```

||

TYPE: EST

STATUS: New

CONT\_NAME: Santos E

CITATION: Identification of differentially expressed genes in response to *Mycosphaerella fijiensis* in the resistant *Musa* accession Calcutta 4 using suppression subtractive hybridization.

LIBRARY: SSH Calcutta *M. fijiensis* library

EST#: 2F7 BMCIBE

DNA\_TYPE: cDNA

PUBLIC:

COMMENT: Raw sequences were clear up, from vector and cloning adaptors, with the program CLC Genomics Workbench (CLC bio, Denmark).

SEQUENCE:

```
ACAACAGGGAGACCTTATGTCTGCCACCGCTGTCGAGCACCCAGTTCTGCACCCAGACA
CCAGATACAGTGCCTATGGACTGACAAAGACGACCAGGACACATACTAAGACAGCAAATC
```

ACTCCAAATAATATTAACGCAGAATTCTCCTCCCTTCATTTTTCTTTGGGCTGCTTTG  
GTAACCTTGGCTCCTGTGGGATCCTTCTTCTCCACGCTTTTGATAACACCCACGGCAACC  
GTCTGTCTCATGTCTCTAACAGCAAACCTACCCAGCGGCGAGT

||

TYPE: EST

STATUS: New

CONT\_NAME: Santos E

CITATION: Identification of differentially expressed genes in response to *Mycosphaerella fijiensis* in the resistant Musa accession Calcutta 4 using suppression subtractive hybridization.

LIBRARY: SSH Calcutta M. fijiensis library

EST#: 2F8 BMCIBE

DNA\_TYPE: cDNA

PUBLIC:

COMMENT: Raw sequences were clear up, from vector and cloning adaptors, with the program CLC Genomics Workbench (CLC bio, Denmark).

SEQUENCE:

CGTTGTGCTTGTTCCTCTCGACATGTTCGACCTGCGGCAACTGCGACTGCGCTGACAAGA  
GCCAGTGCCTGAAGAAGGGAAACAGCTACGCTACCGAGACTGTTGCGACCGAGAAGAGGT  
ATTATTGATCTTGTCCGCATGATGAAATCCACACAACATGACTCAGCAAACATGATCCT  
TTTATTCTTGAAAAACAACCTCAAAAAAGAAGTAAAAAACAGAGAATATATCTGCGAT  
TATTTCTTTTGAGTGATGTGGAACCTCCATGCCATAGCTTAAACTATTTCAAAGTAAT  
GATCAAACCTACCGATGGGCGGCGTATCCCGTTGT

||

TYPE: EST

STATUS: New

CONT\_NAME: Santos E

CITATION: Identification of differentially expressed genes in response to *Mycosphaerella fijiensis* in the resistant Musa accession Calcutta 4 using suppression subtractive hybridization.

LIBRARY: SSH Calcutta M. fijiensis library

EST#: 2G1 BMCIBE

DNA\_TYPE: cDNA

PUBLIC:

COMMENT: Raw sequences were clear up, from vector and cloning adaptors, with the program CLC Genomics Workbench (CLC bio, Denmark).

SEQUENCE:

CTCTGTTCTTCGACGGTTGTCCCCGACTCCCTCTTTTCCCACCGTGCCATTCCCCTGCC  
GATCCCAAAAACCCTTGCTGTAGCCGGCGAAAGCAAGGAGAAAGCGAGATAGATCTAGGA  
AAGCGAAAGCAATAATCAAGCATCCTTTGGTAATCTGAGGTAGTGCGAGTTCGTTACGAA  
GCCATTTCTGTAGAATCTGGAGGTTGCTAGGGGGGAGAGGGGCTGTTGTTGCTGTTGCG  
GAGATGAGCTACGGAAGCAGCTCGATTGCTTCAGGTGCTAAGACTGCTGCAAGGGCGTTT  
GACTTTGGAAGGACCCATGTGGTCAGACCTAAGGGGAGGTACCTGGCCACTGTTGTGTGG  
CTTCATGGCCTAGGTGATAATGGAGCAAGCTGGTCCCAACTCCTGGAAACCCTCCCTCTT  
CCAAATATTAAGTGGATATGCCCAACTGCCCTACCAGGCCTGTAGCAGTTTTTGGTGG  
TTTCTTCAACTGCTTGGTTTGACGTTGGGGATCTGTCAGAGGATGGCCCTGATGATGTT  
GAAGGAATGGATGCATCAGCTGCACATGTTGCAAATTTATTGTCGACAGAGCCTGCTGAT  
ATCAAACCTGGCGTTGGTGGCTTTAGTATGGGTGCTGCCA

||

TYPE: EST

STATUS: New

CONT\_NAME: Santos E

CITATION: Identification of differentially expressed genes in response to *Mycosphaerella fijiensis* in the resistant *Musa* accession Calcutta 4 using suppression subtractive hybridization.

LIBRARY: SSH Calcutta *M. fijiensis* library

EST#: 2G2 BMCIBE

DNA\_TYPE: cDNA

PUBLIC:

COMMENT: Raw sequences were clear up, from vector and cloning adaptors, with the program CLC Genomics Workbench (CLC bio, Denmark).

SEQUENCE:

GGAATTTTTGAATCACATTATCAAGTCCACAAACATGAAGTGCCTCACACCACTCTCGGC  
CTTGGATGGGGAGTGTGGGTTTCTTGCTGCTAACCTATACGCAAGGAGTGTCTTTGGAGA  
GGACGCTCTGGTCAATGTGAGTGTGAGAAGCAGGCAGATGGAAAGCTCAGTGGTTACAT  
CCGATACGGAGCAAGACACAAGGAATTGCTCTGAGTTTAGGGGATAAGATCACTCTCAA  
ACAGAAGGGTGGTAGTTAGTAAGAACCATATCTAGTCTATTCGCTCCAACAT

||

TYPE: EST

STATUS: New

CONT\_NAME: Santos E

CITATION: Identification of differentially expressed genes in response to *Mycosphaerella fijiensis* in the resistant Musa accession Calcutta 4 using suppression subtractive hybridization.

LIBRARY: SSH Calcutta M. fijiensis library

EST#: 2G3 BMCIBE

DNA\_TYPE: cDNA

PUBLIC:

COMMENT: Raw sequences were clear up, from vector and cloning adaptors, with the program CLC Genomics Workbench (CLC bio, Denmark).

SEQUENCE:

GCCGGGGACGCCTAGGATGATGAGGCCGCACGGCTCCGGGCCGAGAACCTCCGTCTGAGA  
GCCATACTCGCCGACAATCTTGCAATCCTGCAAACCATCTATGATTCGCCGACTCTCTCC  
AGCGATTGCCCTCCCGATTGCAATCCCGCCTTTTAGCTGCAGTTGGGAACCTCGAGCTTT  
CTGGGAGAACTTGAATTGCTTCGTAAAGGGTCAAAGACATTCCGAATTGTG

||

TYPE: EST

STATUS: New

CONT\_NAME: Santos E

CITATION: Identification of differentially expressed genes in response to *Mycosphaerella fijiensis* in the resistant Musa accession Calcutta 4 using suppression subtractive hybridization.

LIBRARY: SSH Calcutta M. fijiensis library

EST#: 2G4 BMCIBE

DNA\_TYPE: cDNA

PUBLIC:

COMMENT: Raw sequences were clear up, from vector and cloning adaptors, with the program CLC Genomics Workbench (CLC bio, Denmark).

SEQUENCE:

CCACAGTCGTTGCGGTGGAATTAAGGGGCTTATGTCTATCAAAGAAGATGGCACCCAGAAG  
CAGGTAAGAAACATCACCTCTGTTTTTCATCTTTCAGTAATTGGCAGCATTAGTGTTGACT

CTTTTTCTTGAAAGATGAAATAGATTGGAATTCCTCCAAATTTCTTGGAATTCCGAC  
CAAATGATCCTCCTTATCTGGTTGTGATCAGTGCCTTCATAGAGGACTGGGTGAAGGTCT  
GCTTGCCAGCATTGGAGAAGGTGAAAGCAAATCACTCAGCCTTGCCCTTCGAGGATCAAT  
GCACCCATTGCGAAAAGGTGTTCTTCTCTCCTTTTTTACAATGATATTTCTAGTTCAT  
ACAAGTAAGCAATGTGCAAAGGTTACATTCACCTTCTCTCAAGCTAATTTTAGCAGATGT  
AAAATTGCTACTGCTTCTTGCTCTGAGGATAGTGAATATGATGATTACTGTCAACAGC  
AGCAGAGAAGACTTTTTTGGTTGAAATGTTTTGAGCTGTTGATATCGGAAAGAGAAGTT  
TGCTTTTGCTATTGTGTAGCTGACTGATGCCATTCTTCGACCCCTGGCAGGAGGCAG  
TGAACGTCTCTCTCCACAACCCTGAAGACGTATCCCTTCGTCAAAGATGGACTGGAGAAN  
AAAACACTGAAACTGATCGGGGCACATTTACAACCTTCGTTGCCGGCAGCTTTGACATCTG  
GGAGGTATGAACGGAGGCTTAAAGGANCTCTCATTGTTGTTGT

||

TYPE: EST

STATUS: New

CONT\_NAME: Santos E

CITATION: Identification of differentially expressed genes in response to *Mycosphaerella fijiensis* in the resistant *Musa* accession Calcutta 4 using suppression subtractive hybridization.

LIBRARY: SSH Calcutta *M. fijiensis* library

EST#: 2G5 BMCIBE

DNA\_TYPE: cDNA

PUBLIC:

COMMENT: Raw sequences were clear up, from vector and cloning adaptors, with the program CLC Genomics Workbench (CLC bio, Denmark).

SEQUENCE:

ACCGATGCTAAAATGTCAGCTTTTATGAGATTCAAAGTCCTACCAAGCATCTCCTGTTT  
GGTTCTTTTACAACCGCCCTTCATGCTTTATTTCTGAAGGATCTAAAAGACCTTCCAAG  
ACAACAAGCTGATCCAACAAGCCAGCTTCTCATTTTCCAGAGTTTTCACTTCTGCATCA  
GCTTCGCTGAGTTGGCTGTCCAGTGAGAAGCTTTCTCCTCCAGCAACAGATACTTGTGT  
CTTAA

||

TYPE: EST

STATUS: New



CONT\_NAME: Santos E

CITATION: Identification of differentially expressed genes in response to *Mycosphaerella fijiensis* in the resistant Musa accession Calcutta 4 using suppression subtractive hybridization.

LIBRARY: SSH Calcutta M. fijiensis library

EST#: 2G6 BMCIBE

DNA\_TYPE: cDNA

PUBLIC:

COMMENT: Raw sequences were clear up, from vector and cloning adaptors, with the program CLC Genomics Workbench (CLC bio, Denmark).

SEQUENCE:

```
G TTCATACTAATGGACCTATATTAGATGAAATTATACTTTCTGATCCTGAGATATCCAAT
G CAATTGAGAATGAAAAAGAGGTCAATAAACTGTAAAGATTTATAATGTTGATCGTGCT
G TTTGTGGTCGCATAGCTGGTGTATAGCCAAGAAGTATGGAGATGTAGGTTTTGCGGGG
C AGCTTAATCTAACATTTATTGGAAGTGCTGGACAATCCTTTGCTTGCTTCTTGACTCCT
G GAATGAATATTCGACTAGTTGGGAAGCTAATGATTATGTTGGAAAGGGTATGGCTGGT
G GAGAGCTGGTAGTAACACCTGTTGATGACACTGGTTTCTGCCCGGAGGATGCTACAATA
G TAGGTAACACCTGTCTATATGGTGCAACTGGTGGTCAAATCTTTGTGAGAGGGAAAGCA
G GTGAGCGATTTGCCGTTAGAAATCTCTTGTTGGAAGCTGTGGTTGAGGGCACTGGGGAT
C ATTGTTGTGAGT
```

||

TYPE: EST

STATUS: New

CONT\_NAME: Santos E

CITATION: Identification of differentially expressed genes in response to *Mycosphaerella fijiensis* in the resistant Musa accession Calcutta 4 using suppression subtractive hybridization.

LIBRARY: SSH Calcutta M. fijiensis library

EST#: 2G7 BMCIBE

DNA\_TYPE: cDNA

PUBLIC:

COMMENT: Raw sequences were clear up, from vector and cloning adaptors, with the program CLC Genomics Workbench (CLC bio, Denmark).

SEQUENCE:

TGCTAGTGCACGCCTTCGACTGGAGCCTTCCCGACG

GCGAGGAGCTCAACATGGACGAGAAGTTTGGCCTGGCTCTTCCCAAGGCTGTGCCTCTCA

AAGTTTTTCTGCGCCCGCGCCTGTGCGCCGGCGGCCTACGCCTGATCTCCCTCTCTATCGA

TCTATCTATCTATCTCTCGT

||

TYPE: EST

STATUS: New

CONT\_NAME: Santos E

CITATION: Identification of differentially expressed genes in response to *Mycosphaerella fijiensis* in the resistant Musa accession Calcutta 4 using suppression subtractive hybridization.

LIBRARY: SSH Calcutta M. fijiensis library

EST#: 2G12 BMCIBE

DNA\_TYPE: cDNA

PUBLIC:

COMMENT: Raw sequences were clear up, from vector and cloning adaptors, with the program CLC Genomics Workbench (CLC bio, Denmark).

SEQUENCE:

ACCCATATGCAAAGAAGTATTTGCATCAATTAATTGCCACTGAATGAGAATTACAGCAA

TGCCTGCTTGCAACAACATCATCTCTAGTTCACTAGCATGCAGTCATAAGAACCTCTCT

GTGGTCTCTTCCAGTTTACAAGGTGAGCTTTTCCATCTCCCTCCTCAAGGCGGTGGCTCT

CACGAGGCTGCCGATGGTGTTACGGCGAGCTTGAGGTCGTCGAGGGGGTTCCCCGGCAC

GACCTTCTTGT

||

TYPE: EST

STATUS: New

CONT\_NAME: Santos E

CITATION: Identification of differentially expressed genes in response to *Mycosphaerella fijiensis* in the resistant Musa accession Calcutta 4 using suppression subtractive hybridization.

LIBRARY: SSH Calcutta M. fijiensis library

EST#: 2H2 BMCIBE

DNA\_TYPE: cDNA

PUBLIC:

COMMENT: Raw sequences were clear up, from vector and cloning adaptors, with the program CLC Genomics Workbench (CLC bio, Denmark).

SEQUENCE:

ACACGATCTCAGTAATCTCTCCATCAATGGACATCTCCACCTTCTTCTTCGTTGGGCAAT  
CGGGATAAGTGCACTTGAATAGCCGACCGGGTTCTCGCTCCCTTAATCTGTTTCTGGC  
CATACTTCTCCAGTTGTATCCATCATCTGATCTCCTCTGCCCTCTCACGGCCTGAGAAG  
AACTTGCACGAATTGGGACAACATCTTCAACTTTGACTTCGGGTTTTCGTTCTCCTCCCT  
GGGTTTGAAACAGAAGTCGGAGTAGGCTCCATCCTGTGAATTAGCAGAGAAGCTCCAGT  
TCAGATGCTGTGCAGGGAGAGAACCAGTGGTTGGAGAAGGCAACATAGAGGAAGAGGGGA  
GGAGGAGTGGAGATTCCAAGAGCTCGGCAAGGCTGAGGCTGGTTGGGAAAGAGAAGGAAG  
CAGATGGAGGAGGAGGGGAGAGAGGCAGGAAGGGAGGAGGTGCAGACTTGAACCTGGATG  
TGCCACCTGTATCACCCCCTGCCAATTCCCGGCTCATCTCA

||

TYPE: EST

STATUS: New

CONT\_NAME: Santos E

CITATION: Identification of differentially expressed genes in response to *Mycosphaerella fijiensis* in the resistant *Musa* accession Calcutta 4 using suppression subtractive hybridization.

LIBRARY: SSH Calcutta *M. fijiensis* library

EST#: 2H5 BMCIBE

DNA\_TYPE: cDNA

PUBLIC:

COMMENT: Raw sequences were clear up, from vector and cloning adaptors, with the program CLC Genomics Workbench (CLC bio, Denmark).

SEQUENCE:

ACAATAAGATTATGCCTGAACTCACTCTGACCAGAAAACACAAGCTAGGGAGGCAAAAAA  
TGCGAGTCTGTTTTGCTTTCAGCCAATGACATTGGTTCACAAGCCTCACACCCGCTCGAA  
TGGAAAACACCTAAAACGAATACCTCATTCAAATCTGAGACCTGGCTGCCTTATGTCTC  
CCTCCTAGATCTCCTGGGGCGCGGGGCTGATGCATCATCTTCTCGTTCTCCTCTCTCTC  
CTCGCTGCCTCCTGTAGCTTCAGTCTCAGCAGCTCCAGAGTTGTTAGTTTCAGTGGTTGG  
TGCAACTGGGGCCTGAGGCTTCTTCCCGCCAAAAAGAATCCTGAATATGACAGTAAGAAT  
TACCACCAGAATGGATGCCAGGATCCCAATAGTGAGGTTAGGTTGTTTCTCTGCCTTCTC

AATGACATCAATAATTTTGATCTTGTGGGACTCCAAGAAGGGAATGTCTGCAAACCTTGTA  
AAGAACATCAAATACTTTCTTCTGAAACCTGAAAGGCCATCTGAAGATACGGAAGCATC  
TTCAGCCTTCTGCTTTTCTTCTCAACTTCATATTTAGGCTTCCATGTCT

||

TYPE: EST

STATUS: New

CONT\_NAME: Santos E

CITATION: Identification of differentially expressed genes in response to *Mycosphaerella fijiensis* in the resistant *Musa* accession Calcutta 4 using suppression subtractive hybridization.

LIBRARY: SSH Calcutta *M. fijiensis* library

EST#: 2H6 BMCIBE

DNA\_TYPE: cDNA

PUBLIC:

COMMENT: Raw sequences were clear up, from vector and cloning adaptors, with the program CLC Genomics Workbench (CLC bio, Denmark).

SEQUENCE:

ACAAGCTTTTTTTTTTTTTTTTTTTTTTTTTTTTTTTTTTTAGGAAAAATGACCGAAAAAAT  
AACTTTCATCAATGTTACGGTCCACTGACAATCAAAATTGTTACCTAACATAACCAAA  
CCATTA AAAAGAATTAGTCTTCTCCAACACAGATGAATAAACTTTTAGGAAATGACTTC  
AAGATCGAAAGACAACATCAAAGAGGATTGTTAAGCTCATCGCTTCTTAAAGACACCAAC  
AGTCTTCCCTCCTGCCAGTTGTCTTGGTGTGCTGACCGCGAACTCGAAAACCCAGAA  
GTGACGGAAACCACGGGGTTCCTTATCTTCTTCAGTCTCTCAAGGTCATCCCTCAGCTT  
CATGTCTAAGGCATTTGAAACAACCTGAGAATATCGTCCATCCTTGAGTCTTTCTTCT  
GTTCAAGAACCAATCCGGGATCTTGAACCTGGCGCGGATTGGCAACAATTGTCATCAAGTT  
CTCGAGTTCGGCAGCCGAAATCTCACCAGCCCTTATTTCATGTGCGACGTCGGCCTTCTT  
GCAGACGATGTTTCGCGAAGCGGCGGCGGATAACCTTGATAGAGGTGAGAGCGAACATGAT  
CTTCTGCTTCCCATCGACGTTCTGTGTTTTCAGAACACGAAGAATGTGCTGGAAATCCTCGTT  
CGCGACCAGCGACATGGCAGCGGCTAANGTTTCGCTGTCCGCCCTACGTCTGATCTCGCT  
TCTCTCCCTATG

||

TYPE: EST

STATUS: New

CONT\_NAME: Santos E

CITATION: Identification of differentially expressed genes in response to *Mycosphaerella fijiensis* in the resistant *Musa* accession Calcutta 4 using suppression subtractive hybridization.

LIBRARY: SSH Calcutta *M. fijiensis* library

EST#: 2H7 BMCIBE

DNA\_TYPE: cDNA

PUBLIC:

COMMENT: Raw sequences were clear up, from vector and cloning adaptors, with the program CLC Genomics Workbench (CLC bio, Denmark).

SEQUENCE:

```
ACCCACCAAGAGTAGCAAACATCGGCAAACCTCTCAGGACGGCCATTCAATCCTCCATCT
TTACATTGCCGCTCACACAACCACCAACCAAGCAGGTCCCTGTCGACATGGTGCAGGGAA
CCCGTGATTGCAAGCGCACCGACACAACAGAAGATCTGGCCAGCATGTGACTCCCCACCG
GGTATAGACCCAAATCCACCGTCTAGGTTTTTGCAGCTGACAATGTAATTTACAGCCTTT
TCCACATTGATTTTACTTAGAC
```

||

TYPE: EST

STATUS: New

CONT\_NAME: Santos E

CITATION: Identification of differentially expressed genes in response to *Mycosphaerella fijiensis* in the resistant *Musa* accession Calcutta 4 using suppression subtractive hybridization.

LIBRARY: SSH Calcutta *M. fijiensis* library

EST#: 2H10 BMCIBE

DNA\_TYPE: cDNA

PUBLIC:

COMMENT: Raw sequences were clear up, from vector and cloning adaptors, with the program CLC Genomics Workbench (CLC bio, Denmark).

SEQUENCE:

```
ACCAGGGGCCCGCCCGACGTGCCTCTTCCTCACCTAC
TCCAATGAACCATTATGTCCTGTTTTTTCCCTGTGCTGCCGCTTGTGCGTGTACCATCC
CACGCCATGAATTGTTTCTTCGAGGAGCTGGGCTTGACTTACCAGGAAATCCTGTTTCTC
TTGCTGCATGCTGATGAACTCAAAGGGTTACATCATTGATGCAGCTGAACGTCATGCC
```

CCCTTTGGGCTCATAATGGAAGGCCAGGGCTTGACGGCATTGTCGGGGCCACTCCGGAN  
CCAATAAGGAAGAGGATCGATGGTTACGTTCTTCTTGGCCCTCCCTTTTATGGTCCACGA  
CTGGGAAATCCCTGCCGATACCCCCCTCCACCCTGTTCTTGCTCTCCC

||

TYPE: EST

STATUS: New

CONT\_NAME: Santos E

CITATION: Identification of differentially expressed genes in response to *Mycosphaerella fijiensis* in the resistant Musa accession Calcutta 4 using suppression subtractive hybridization.

LIBRARY: SSH Calcutta M. *fijiensis* library

EST#: 2H11 BMCIBE

DNA\_TYPE: cDNA

PUBLIC:

COMMENT: Raw sequences were clear up, from vector and cloning adaptors, with the program CLC Genomics Workbench (CLC bio, Denmark).

SEQUENCE:

TCACAACCAGAGGTCATGGAGCTGTCATAAATATTT  
ACAGATTATCTCCATTTTCAGTTCCTGCTTTCAATTTGGGTGACTATTTTATTGATAAAA  
TTACTCCAGAATCTGGATGATAGCAGCTACCTTCTACCATCTCGTCCCTAGCAGCTT  
CTTGGTCACAGATGACATTGCATGTTGCAAGGT

||

TYPE: EST

STATUS: New

CONT\_NAME: Santos E

CITATION: Identification of differentially expressed genes in response to *Mycosphaerella fijiensis* in the resistant Musa accession Calcutta 4 using suppression subtractive hybridization.

LIBRARY: SSH Calcutta M. *fijiensis* library

EST#: 2H12 BMCIBE

DNA\_TYPE: cDNA

PUBLIC:

COMMENT: Raw sequences were clear up, from vector and cloning adaptors, with the program CLC Genomics Workbench (CLC bio, Denmark).

SEQUENCE:

CCCTCAACAACCTGGGCCACCCACCTGAGCGACCCAC

TCCACACCACCATCATCGACAACGTCTTCTTCGCCTCCTCCTAAGTGCGACAAGACA

TCGATCGGCTTCACCTTCCCTCCCTCCCATGGCGATCTCCTTGTGTGGGATTCCTGTG

GTGGGGGTTAATTCCTGTGT

||
