# Supplementary material for: Identification of Differentially-Expressed Genes in Response to Mycosphaerella fijiensis in the Resistant Musa Accession ‘Calcutta-4’ Using Suppression Subtractive Hybridization
Source: PubMed Central journal article supplement (PMC4972352; doi:10.1371/journal.pone.0160083), 2016-08-03
Supplement: pone.0160083.s002.pdf [file pone.0160083.s002.pdf]

**S1 Table.** Sequence similarity search of the ESTs obtained from the cDNA subtracted library to the banana genome sequence using blastn (<http://banana-genome.cirad.fr/>).

| Clone | BANANA GENOME |          |          |        |        |            |                               | Coding protein in the homology region of the query in the banana genome using gbrowse  |                      |
|-------|---------------|----------|----------|--------|--------|------------|-------------------------------|----------------------------------------------------------------------------------------|----------------------|
|       | blastn        |          |          |        |        |            | Name                          |                                                                                        | Description/function |
|       | Chromosome    | Start    | End      | Strand | Evalue | % Identity |                               |                                                                                        |                      |
| 1A1   | chr6          | 28983573 | 28983928 | -      | 1E-78  | 100        | GSMUA_Achr6P28670_00          | GSMUA_Achr6T28670_001~ Light-regulated protein~ LIR1~ modules                          |                      |
| 1A3   | chr10         | 30215884 | 30216201 | +      | 2E-70  | 98,6       | GSMUA_Achr10P26880_001        | GSMUA_Achr10T26880_001~ Putative Zinc finger protein CONSTANS-LIKE 16~ COL16~ complete |                      |
| 1A7   | chr10         | 32034433 | 32034646 | -      | 1E-115 | 99,53      | GSMUA_Achr10P29540_001        | GSMUA_Achr10T29540_001~ Formate--tetrahydrofolate ligase~ THFS~ complete               |                      |
| 1B3   | chr7          | 8858019  | 8858520  | +      | 6E-62  | 100        | GSMUA_Achr7P11100_001         | Beta-amylase 3, chloroplastic~ BAM3~ complete                                          |                      |
| 1B4   | chr6          | 15073662 | 15073864 | +      | 4E-99  | 97,54      | GSMUA_Achr6P20490_001         | GSMUA_Achr6T20490_001~ Putative uncharacterized protein~ EP300~ fragment               |                      |
| 1B5   | chr7          | 3434854  | 3435440  | +      | 0      | 98,3       |                               |                                                                                        |                      |
| 1B9   | chr11         | 745843   | 746191   | -      | 2E-92  | 99,43      | GSMUA_Achr11P01090_001        | GSMUA_Achr11T01090_001~ Serine carboxypeptidase-like 18~ SCPL18~ complete              |                      |
| 1B10  | chr4          | 21424882 | 21425154 | -      | 1E-115 | 92,67      | GSMUA_Achr4P20880_001         | GSMUA_Achr4T20880_001~ expressed protein~ TCHHL1~ complete                             |                      |
| 1C3   | chrUn_random  | 3933750  | 3934193  | -      | 4E-89  | 94,74      | GSMUA_AchrUn_randomP01190_001 | PREDICTED FUNCTION: Ankyrin repeat domain-containing protein, chloroplastic            |                      |
| 1C7   | chr4          | 26380220 | 26380391 | +      | 8e-56  | 97,67      | GSMUA_Achr4G27630_001         | GSMUA_Achr4T27630_001~ Putative Protein SYM1~ SYM1~ modules                            |                      |

|      |       |          |          |   |        |       |                        |                                                                                                                                                                            |
|------|-------|----------|----------|---|--------|-------|------------------------|----------------------------------------------------------------------------------------------------------------------------------------------------------------------------|
| 1C8  | chr9  | 29437197 | 29438438 | - | 0      | 97,44 | GSMUA_Achr9P24740_001  | GSMUA_Achr9T24740_001~ 22.3 kDa class VI heat shock protein~ HSP22.3~ modules; GSMUA_Achr9T24750_001~ Oxygen-evolving enhancer protein 3-2, chloroplastic~ PSBQ2~ complete |
| 1C9  | chr8  | 5439390  | 5439812  | + | 0      | 98,35 | GSMUA_Achr8P08070_001  | GSMUA_Achr8T08070_001~ V-type proton ATPase 16 kDa proteolipid subunit c1/c3/c5~ VHA-C1~ complete                                                                          |
| 1C10 | chr5  | 6132897  | 6133428  | - | 0      | 99,62 | GSMUA_Achr5P08410_001  | GSMUA_Achr5T08410_001~ Putative Protein GPR107~ Gpr107~ fragment                                                                                                           |
| 1D2  | chr11 | 24130202 | 24130640 | - | 0      | 97,72 | GSMUA_Achr11P24730_001 | GSMUA_Achr11T24730_001~ Zinc finger CCCH domain-containing protein 33~ Os05g0128200~ complete                                                                              |
| 1E1  | chr7  | 25585417 | 25585986 | + | 1E-158 | 99,31 | GSMUA_Achr7P23330_001  | GSMUA_Achr7T23330_001~ no apical meristem protein, putative, expressed~ NAC078~ complete                                                                                   |
| 1E3  | chr5  | 2701715  | 2702692  | + | 1E-156 | 99,65 | GSMUA_Achr5P03850_001  | GSMUA_Achr5T03850_001~ Uncharacterized protein At1g03900~ At1g03900~ complete                                                                                              |
| 1E6  | chr9  | 12689047 | 12689910 | + | 1E-127 | 100   | GSMUA_Achr9P18120_001  | GSMUA_Achr9T18120_001~ Putative Uncharacterized protein yqjG~ yqjG~ modules                                                                                                |
| 1E7  | chr2  | 16494498 | 16494722 | + | 1E-119 | 99,11 | GSMUA_Achr2P14960_001  | GSMUA_Achr2T14960_001~ Chlorophyll a-b binding protein 4, chloroplastic~ LHCA4~ complete                                                                                   |
| 1E8  | chr1  | 7231159  | 7232974  | - | 1E-159 | 98,99 | GSMUA_Achr1P09400_001  | GSMUA_Achr1T09400_001~ Glucose-1-phosphate adenyltransferase small subunit, chloroplastic~ AGPS1~ complete                                                                 |
| 1F11 | chr11 | 22726181 | 22727063 | + | 1E-131 | 99,18 | GSMUA_Achr11P22440_001 | GSMUA_Achr11T22440_001~ Probable serine/threonine-protein kinase At4g35230~ At4g35230~ fragment                                                                            |
| 1G10 | chr4  | 1175651  | 1175797  | - | 1E-28  | 97,26 | GSMUA_Achr4P01380_001  | GSMUA_Achr4T01380_001~ Malate dehydrogenase, glyoxysomal~ MDHG~ complete                                                                                                   |

|      |              |           |           |   |        |       |                               |                                                                                                                         |
|------|--------------|-----------|-----------|---|--------|-------|-------------------------------|-------------------------------------------------------------------------------------------------------------------------|
| 1B12 | chr6         | 17015937  | 17016383  | + | 1E-135 | 99,21 | GSMUA_Achr6P21320_001         | GSMUA_Achr6T21320_001~ Salt tolerance protein~ STO~ complete                                                            |
| 1C2  | chr9         | 28759261  | 28759665  | - | 1E-134 | 98,82 | GSMUA_Achr9P23930_001         | GSMUA_Achr9T23930_001~ UTP-- glucose-1-phosphate uridylyltransferase~ UGPA~ complete                                    |
| 1D8  | chr5         | 2552022   | 2552414   | - | 1E-130 | 98,05 | GSMUA_Achr5P03660_001         | GSMUA_Achr5T03660_001~ phosphoribulokinase/Uridine kinase family protein, expressed~ At1g32060~ complete                |
| 1D11 | chr7         | 8794936   | 8795220   | + | 1E-127 | 95,09 | GSMUA_Achr7P10930_001         | GSMUA_Achr7T10930_001~ Auxin-responsive protein IAA27~ IAA27~ complete                                                  |
| 1E4  | chrUn_random | 70954961  | 70955197  | + | 1E-114 | 97,05 | *                             |                                                                                                                         |
| 1F8  | chrUn_random | 123816337 | 123816711 | + | 0      | 100   | **                            |                                                                                                                         |
| 1G5  | chr3         | 23245517  | 23245189  | - | 2E-82  | 86,32 | GSMUA_Achr3P22310_001         | GSMUA_Achr3G22310_001~ Putative disease resistance RPP13-like protein 1~ RGA1~ missing_completeness                     |
| 2A2  | chr9         | 10334989  | 10335278  | + | 1E-160 | 99,66 | GSMUA_Achr9P15630_001         | GSMUA_Achr9T15630_001~ Putative Protein TIFY 6B~ TIFY6B~ complete                                                       |
| 2A4  | chrUn_random | 101014989 | 101015172 | - | 3E-97  | 99,46 | GSMUA_AchrUn_randomP20820_001 | GSMUA_AchrUn_randomP20820_001                                                                                           |
| 2A6  | chr9         | 29262330  | 29264458  | + | 6E-60  | 100   | GSMUA_Achr9P24480_001         | GSMUA_Achr9T24480_001~ ATP-dependent Clp protease proteolytic subunit-related protein 4, chloroplastic~ CLPR4~ complete |
| 2A9  | Chr4         | 15050206  | 15050330  | + | 4e-30  | 89,76 |                               |                                                                                                                         |
| 2A10 | chr3         | 6915216   | 6915410   | + | 6E-27  | 96,05 | GSMUA_Achr3P09560_001         | GSMUA_Achr3T09560_001~ Putative Repressor of RNA polymerase III                                                         |

|      |              |           |           |   |        |       |                        |                                                                                                                                                                                |
|------|--------------|-----------|-----------|---|--------|-------|------------------------|--------------------------------------------------------------------------------------------------------------------------------------------------------------------------------|
|      |              |           |           |   |        |       |                        | transcription MAF1 homolog~ MAF1~ fragment                                                                                                                                     |
| 2A11 | chr6         | 8595226   | 8595826   | + | 1E-174 | 99,37 | GSMUA_Achr6P12860_001  | GSMUA_Achr6T12850_001~ Hypothetical protein~ NdeI~ missing_functional_completeness; GSMUA_Achr6T12860_001~ Hypothetical protein~ unknown_gene~ missing_functional_completeness |
| 2B1  | chr9         | 1101616   | 1101910   | - | 3E-82  | 100   | GSMUA_Achr9P01470_001  | GSMUA_Achr9T01470_001~ Chlorophyll a-b binding protein 7, chloroplastic~ CAB7~ complete                                                                                        |
| 2B4  | chrUn_random | 123816337 | 123816721 | - | 0      | 100   |                        | ***                                                                                                                                                                            |
| 2B6  | chr6         | 32312511  | 32314046  | + | 9E-69  | 94,77 | GSMUA_Achr6P33160_001  | GSMUA_Achr6T33160_001~ Protein IN2-1 homolog B~ GSTZ5~ complete                                                                                                                |
| 2B8  | chr11        | 23925951  | 23926418  | + | 1E-121 | 100   | GSMUA_Achr11P24320_001 | GSMUA_Achr11T24320_001~ Ribulose biphosphate carboxylase/oxygenase activase 2, chloroplastic~ RCA2~ complete                                                                   |
| 2B9  | chr11        | 20339360  | 20341217  | - | 2E-76  | 100   | GSMUA_Achr11P19110_001 | Glyceraldehyde-3-phosphate dehydrogenase, cytosolic 3~ GAPC3~ modules                                                                                                          |
| 2B10 | chr9         | 7550185   | 7550930   | + | 1E-173 | 98,77 | GSMUA_Achr9P11610_001  | GSMUA_Achr9T11610_001~ Putative Protein TRANSPARENT TESTA 12~ TT12~ complete                                                                                                   |
| 2B11 | chr5         | 9797297   | 9797677   | - | 0      | 99,48 | GSMUA_Achr5P13610_001  | GSMUA_Achr5T13610_001~ UPF0496 protein 4~ Osl_033149~ fragment                                                                                                                 |

|      |              |           |           |   |       |       |                               |                                                                                                   |
|------|--------------|-----------|-----------|---|-------|-------|-------------------------------|---------------------------------------------------------------------------------------------------|
| 2B12 | chr1         | 13052506  | 13053311  | - | 1E-54 | 100   | GSMUA_Achr1P17550_001         | GSMUA_Achr1T17550_001~ Catalase isozyme 2~ CAT2~ fragment                                         |
| 2C1  | chrUn_random | 12130474  | 12130559  | - | 8E-31 | 94,19 |                               |                                                                                                   |
| 2C5  | chr6         | 26856514  | 26856625  | - | 2E-50 | 97,32 | GSMUA_Achr6P25880_001         | GSMUA_Achr6T25880_001~ Putative NAD-dependent ADP-ribosyltransferase sirtuin-4~ SIRT4~ modules    |
| 2C7  | chrUn_random | 42512360  | 42512704  | - | 4E-84 | 100   | GSMUA_AchrUn_randomP09150_001 | GSMUA_AchrUn_randomT09150_001~ Putative peroxisomal-coenzyme A synthetase~ SPCC1827.03c~ complete |
| 2C8  | chr11        | 14193136  | 14193501  | - | 0     | 97,81 | GSMUA_Achr11P13450_001        | GSMUA_Achr11T13450_001~ Hypothetical protein~ AF_0788~ missing_functional_completeness            |
| 2C9  | chrUn_random | 117571845 | 117572238 | - | 0     | 99,24 | GSMUA_AchrUn_randomT23890_001 | GSMUA_AchrUn_randomT23890_001~ Putative Cellulose synthase-like protein G3~ CSLG3~ fragment       |
| 2C10 | chr2         | 19078834  | 19079103  | - | E-135 | 92,65 | GSMUA_Achr2G18820_001         | GSMUA_Achr2T18820_001~ Putative Protein RIC1 homolog~ Kiaa1432~ fragment                          |
| 2C11 | chr10        | 16215253  | 16216324  | - | e-111 | 95,77 | GSMUA_Achr10P05740_001        | GSMUA_Achr10T05740_001~ Putative Haloalkane dehalogenase 2~ dhmA2~ modules                        |
| 2C12 | chr3         | 20217521  | 20220433  | - | 2E-73 | 99,31 | GSMUA_Achr3P18840_001         | GSMUA_Achr3T18840_001~ Somatic embryogenesis receptor kinase 1~ SERK1~ fragment                   |
| 2D1  | chr7         | 27168512  | 27169617  | + | 1E-57 | 99,15 | GSMUA_Achr7P25580_001         | GSMUA_Achr7T25580_001~ Putative glucose-6-phosphate 1-epimerase~ YMR099C~ modules                 |

|      |              |          |          |   |        |       |                               |                                                                                              |
|------|--------------|----------|----------|---|--------|-------|-------------------------------|----------------------------------------------------------------------------------------------|
| 2D3  | chr6         | 33541360 | 33541672 | + | e-171  | 97,44 | GSMUA_Achr6P35290_001         | GSMUA_Achr6T35290_001~ expressed protein~ mx~ complete                                       |
| 2D5  | chr10        | 21970294 | 21970364 | + | 1E-25  | 95,77 | GSMUA_Achr10P13230_001        | GSMUA_Achr10T13230_001~ Elongation factor 1-alpha~ TEF1~ fragment                            |
| 2D6  | chr2         | 17229995 | 17230522 | - | 0      | 99,52 | GSMUA_Achr2P16250_001         | GSMUA_Achr2T16250_001~ Heat shock cognate 70 kDa protein~ HSP70~ fragment                    |
| 2D7  | chr8         | 16727860 | 16728300 | - | 1E-117 | 99,54 | GSMUA_Achr8P17280_001         | GSMUA_Achr8T17280_001~ Fructose-bisphosphate aldolase, chloroplastic~ Os11g0171300~ complete |
| 2D10 | chr3         | 1817893  | 1819721  | + | 0      | 99,35 | GSMUA_Achr3P02780_001         | GSMUA_Achr3T02780_001~ Chlorophyll a-b binding protein CP26, chloroplastic~ LHCB5~ complete  |
| 2D11 | chr1         | 16090193 | 16091595 | - | 2E-94  | 99,44 | GSMUA_Achr1P21370_001         | GSMUA_Achr1T21370_001~ Transcription initiation factor IIB~ TFIIIB~ complete                 |
| 2D12 | chr5         | 8718524  | 8718883  | - | 1E-171 | 96,4  | GSMUA_Achr5P12030_001         | GSMUA_Achr5T12030_001~ Putative LanC-like protein 2~ Lancl2~ complete                        |
| 2E1  | chr10        | 1199115  | 1199619  | + | 9e-88  | 98,02 | GSMUA_Achr10P00610_001        | GSMUA_Achr10T00610_001~ Putative expressed protein~ unknown_gene~ complete                   |
| 2E2  | chrUn_random | 17934166 | 17934481 | - | e-164  | 97,5  | GSMUA_AchrUn_randomP04190_001 | GSMUA_AchrUn_randomT04190_001~ expressed protein~ pheT~ complete                             |
| 2E3  | chr3         | 2617161  | 2617502  | + | e-179  | 96,78 | GSMUA_Achr3P04110_001         | GSMUA_Achr3T04110_001~ Chlorophyll a-b binding protein 8, chloroplastic~ CAB8~ complete      |

|      |              |          |          |   |        |       |                        |                                                                                          |
|------|--------------|----------|----------|---|--------|-------|------------------------|------------------------------------------------------------------------------------------|
| 2E4  | chr2         | 11068977 | 11069082 | + | 8E-42  | 95,28 | GSMUA_Achr2P06190_001  | GSMUA_Achr2T06190_001~ Putative UPF0420 protein C16orf58 homolog~ C16orf58~ fragment     |
| 2E6  | chr6         | 396916   | 397630   | + | 0      | 99,1  | GSMUA_Achr6P00600_001  | GSMUA_Achr6T00600_001~ Putative serine/threonine-protein kinase receptor~ SRK6~ complete |
| 2E7  | chr4         | 10870225 | 10870384 | - | 4E-71  | 97,55 | GSMUA_Achr4P14550_001  | GSMUA_Achr4T14550_001~ Hypothetical protein~ GRP7~ missing_functional_completeness       |
| 2E8  | chr3         | 5964051  | 5965393  | + | e-171  | 96    | GSMUA_Achr3P08390_001  | GSMUA_Achr3T08390_001~ ABC transporter I family member 20~ ABCI20~ complete              |
| 2E9  | chr2         | 16130033 | 16130294 | + | 1E-123 | 96,23 | GSMUA_Achr2P14320_001  | GSMUA_Achr2T14320_001~ Isoflavone reductase homolog~ IRL~ complete                       |
| 2E10 | chr5         | 4575829  | 4576202  | + | 0      | 98,66 | GSMUA_Achr5P06180_001  | GSMUA_Achr5T06180_001~ Putative pleiotropic drug resistance protein 7~ PDR7~ complete    |
| 2E11 | chr3         | 19835729 | 19835972 | + | 1E-130 | 99,18 | GSMUA_Achr3P18360_001  | GSMUA_Achr3T18360_001~ expressed protein~ Dync2h1~ complete                              |
| 2E12 | chrUn_random | 70974586 | 70974752 | + | 6e-92  | 100   | ****                   |                                                                                          |
| 2F1  | chr6         | 4620097  | 4620570  | - | 8E-75  | 100   | GSMUA_Achr6P06810_001  | GSMUA_Achr6T06810_001~ Predicted protein~ Glyctk~ complete                               |
| 2F2  | chr10        | 22718648 | 22718949 | - | 1E-165 | 99,34 | GSMUA_Achr10P14480_001 | GSMUA_Achr10T14480_001~ Uncharacterized protein At4g01050~ At4g01050~ complete           |

|     |       |          |          |   |        |       |                        |                                                                                                         |
|-----|-------|----------|----------|---|--------|-------|------------------------|---------------------------------------------------------------------------------------------------------|
| 2F3 | chr8  | 26943234 | 26944937 | + | 1E-169 | 98,44 | GSMUA_Achr8P22320_001  | GSMUA_Achr8T22320_001~ ATP-dependent Clp protease proteolytic subunit 5, chloroplastic~ CLPP5~ complete |
| 2F4 | chr9  | 5413959  | 5415449  | - | 3E-46  | 98,99 | GSMUA_Achr9P08450_001  | GSMUA_Achr9T08450_001~ Alcohol dehydrogenase 2~ ADH2~ complete                                          |
| 2F7 | chr6  | 1307033  | 1307315  | + | 1E-156 | 99,65 | GSMUA_Achr6P02020_001  | GSMUA_Achr6T02020_001~ Elongation factor 1-alpha, putative, expressed~ EF1~ modules                     |
| 2F8 | chr6  | 27042062 | 27042533 | - | 6e-59  | 98,36 | GSMUA_Achr6P26180_001  | GSMUA_Achr6T26180_001~ Metallothionein-like protein type 3~ MT3A~ complete                              |
| 2G1 | chr2  | 19670104 | 19672708 | + | 3E-78  | 98,14 | GSMUA_Achr2P19690_001  | GSMUA_Achr2T19690_001~ Putative Acyl-protein thioesterase 2~ LYPLA2~ complete                           |
| 2G2 | chr7  | 12845913 | 12846386 | - | 1E-132 | 99,19 | GSMUA_Achr7P15960_001  | GSMUA_Achr7T15960_001~ Coatomer subunit beta-1~ Os11g0174000~ fragment                                  |
| 2G3 | chr1  | 16053104 | 16053995 | + | 5E-65  | 97,83 | GSMUA_Achr1P21330_001  | GSMUA_Achr1T21330_001~ Putative expressed protein~ Pkhd11~ complete                                     |
| 2G4 | chr4  | 11213343 | 11213954 | - | 0      | 97,88 | GSMUA_Achr4P14900_001  | GSMUA_Achr4T14900_001~ Hypothetical protein~ CA2~ missing_functional_completeness                       |
| 2G5 | chr10 | 23470756 | 23471006 | + | 1E-130 | 98,41 | GSMUA_Achr10P15590_001 | GSMUA_Achr10T15590_001~ Putative expressed protein~ YKL214C~ complete                                   |
| 2G6 | chr2  | 11530055 | 11531710 | + | 1E-106 | 98,55 | GSMUA_Achr2P06800_001  | GSMUA_Achr2T06800_001~ Ferredoxin-dependent glutamate synthase, chloroplastic~ GLU~ complete            |



|      |              |           |           |   |        |       |                               |                                                                                                         |
|------|--------------|-----------|-----------|---|--------|-------|-------------------------------|---------------------------------------------------------------------------------------------------------|
| 2G7  | chr9         | 11832587  | 11832766  | - | 2e-97  | 100   | GSMUA_Achr9P17300_001         | GSMUA_Achr9T17300_001~ Flavonoid 3',5'-hydroxylase 1~ CYP75A1~ complete                                 |
| 2G12 | chr8         | 28416325  | 28416575  | - | 1E-137 | 99,6  | GSMUA_Achr8P24130_001         | GSMUA_Achr8T24130_001~ Geranylgeranyl diphosphate reductase, chloroplastic~ CHLP~ complete              |
| 2H2  | chr3         | 7213712   | 7214421   | - | 1E-128 | 99,17 | GSMUA_Achr3P09940_001         | GSMUA_Achr3T09940_001~ Probable WRKY transcription factor 26~ WRKY26~ complete                          |
| 2H5  | chr10        | 24606255  | 24607294  | + | 1E-160 | 97,78 | GSMUA_Achr10P17330_001        | GSMUA_Achr10T17330_001~ Calnexin homolog 1~ CNX1~ complete                                              |
| 2H6  | chr4         | 21859446  | 21862267  | - | e-117  | 94,72 | GSMUA_Achr4P21360_001         | GSMUA_Achr4T21360_001~ 40S ribosomal protein S18~ RPS18A~ modules                                       |
| 2H7  | chr9         | 5771119   | 5771604   | + | 9E-64  | 97,79 | GSMUA_Achr9P08930_001         | GSMUA_Achr9T08930_001~ Geranylgeranyl transferase type-2 subunit beta~ RABGGTB~ complete                |
| 2H10 | chr9         | 33539222  | 33539292  | + | 3E-15  | 90,14 | GSMUA_Achr9P30140_001         | GSMUA_Achr9T30140_001~ Thioredoxin-like protein CXXS1~ CXXS1~ complete                                  |
| 2H11 | chr5         | 15110821  | 15111018  | + | 1E-103 | 98,99 | GSMUA_Achr5P16630_001         | GSMUA_Achr5T16630_001~ Transcription factor TGA1~ TGA1~ complete                                        |
| 2H12 | chrUn_random | 136799407 | 136799589 | - | 4E-99  | 100   | GSMUA_AchrUn_randomP28100_001 | GSMUA_AchrUn_randomT28100_001~ Chlorophyll a-b binding protein CP29.3, chloroplastic~ LHCB4.2~ fragment |

\*Identity found to a gene coding for the chloroplast 23S ribosomal RNA (blastn, nr, GenBank).

\*\*Identity found to a gene coding for the mitochondrial 26S ribosomal RNA (blastn, nr, GenBank).

\*\*\* Identity found to a gene coding for the mitochondrial 26S ribosomal RNA (blastn, nr, GenBank).

\*\*\*\* Identity found to a gene coding for the chloroplast 23S ribosomal RNA (blastn, nr, GenBank).
